# Supplementary material for: FRET Assays for the Identification of C. albicans HSP90-Sba1 and Human HSP90α-p23 Binding Inhibitors
Source: MDPI journal article supplement (doi:10.3390/ph17040516), 2024-04-17
Supplement: s1 [file s1]

## Supplementary Materials

### Figures

#### A *C. albicans*

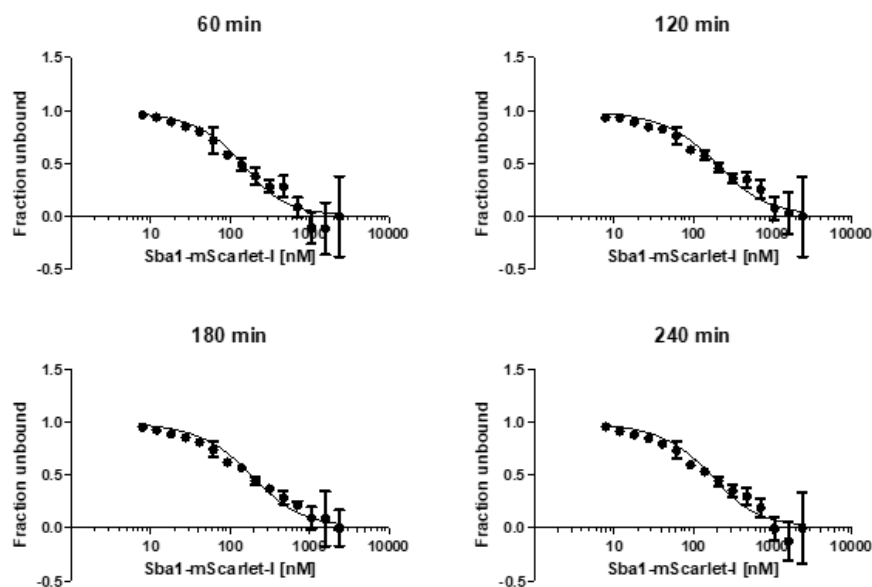

| Time point (min) | $K_d$ (nM) | PCI 95.5% (nM) | ACI 95.5% (nM) |
|------------------|------------|----------------|----------------|
| 60               | 50         | 30-80          | 50-70          |
| 120              | 100        | 80-130         | 100-140        |
| 180              | 100        | 70-120         | 100-130        |
| 240              | 80         | 50-110         | 80-110         |

#### B *human* – HSP90 $\alpha$

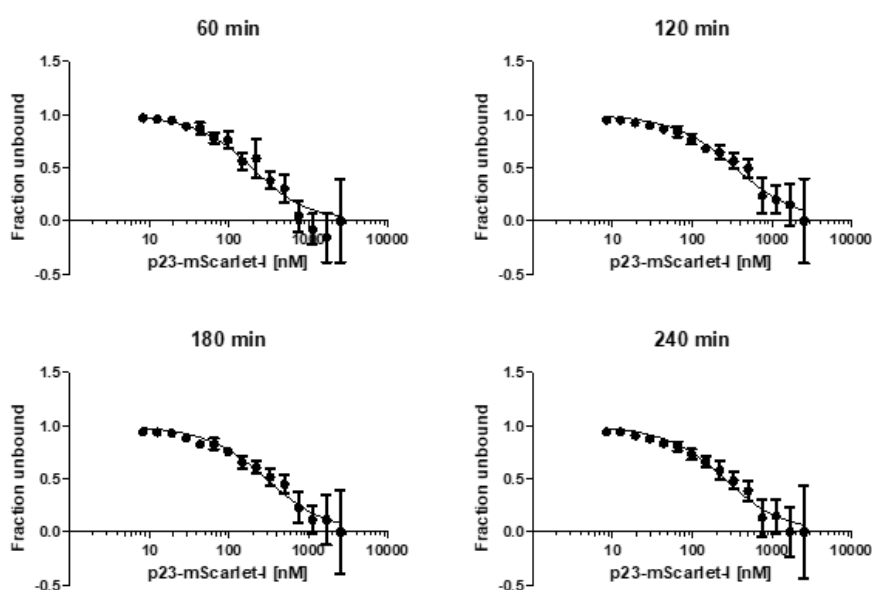

| Time point (min) | $K_d$ (nM) | PCI 95.5% (nM) | ACI 95.5% (nM) |
|------------------|------------|----------------|----------------|
| 60               | 120        | 70-170         | 90-140         |
| 120              | 270        | 220-320        | 240-320        |
| 180              | 220        | 180-260        | 200-270        |
| 240              | 180        | 140-210        | 150-220        |

**Figure S1.** Equilibrium check of *C. albicans* HSP90 – Sba1 and *human* HSP90 $\alpha$  – p23 binding. 200 nM donor molecule was incubated at 30 °C (*C. albicans* HSP90E36A-mNeonGreen) or 37 °C (*human* HSP90 $\alpha$ E47A-mNeonGreen) with 0–3 000 nM (lowest non-zero concentration 10 nM) of acceptor molecule (*C. albicans* Sba1-mScarlet-I) or (*human* p23-mScarlet-I) and measured every 60 min for up to 4 h. The equilibrium dissociation constant ( $K_d$ ) of the interaction was calculated for all time points with GraphPad Prism5. Precision and accuracy confidence interval (PCI and ACI, respectively) at a 95.5% confidence level were determined according to the method of Wang et al. [29].

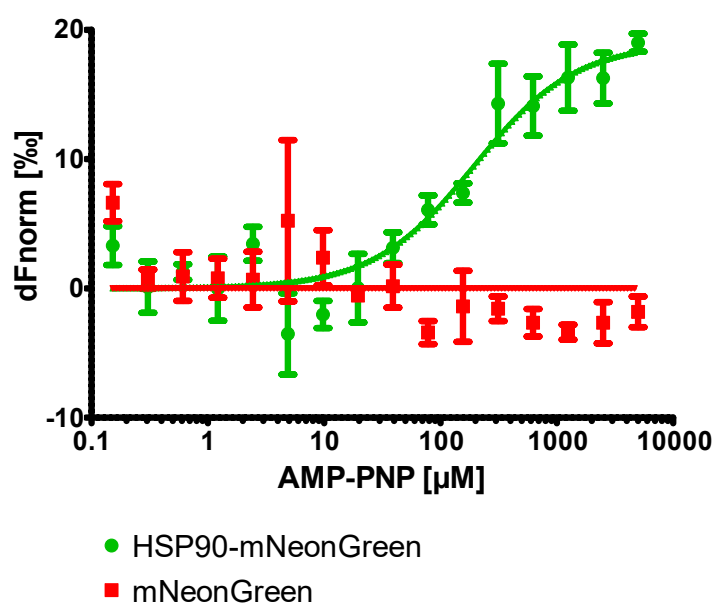

**Figure S2.** AMP-PNP binding affinity to *C. albicans* HSP90. In this MST experiment the concentration of HSP90-mNeonGreen (green circles) as well as for the negative control mNeonGreen (red squares) was kept constant (50 nM), while the concentration of the non-labeled ligand (AMP-PNP) was varied between 153–5 000 nM. After 5 min incubation at room temperature, the samples were loaded into Monolith NT.115 Capillaries (NanoTemper Technologies, Munich, Germany) and the MST measurement was performed at room temperature using the Monolith NT.115 (NanoTemper Technologies, Munich, Germany) at 35% LED power and high (80%) MST power. An MST-on time of 30 s was used for analysis, and a  $K_d$  of  $200 \pm 70 \mu\text{M}$  was derived.  $n = 3$  independent measurements, error bars represent the standard deviation.

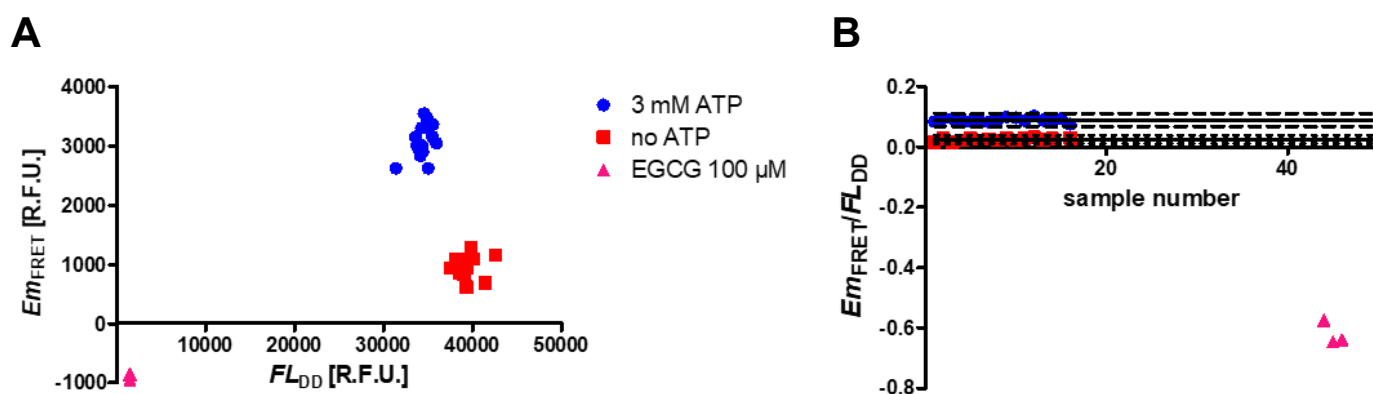

**Figure S3.** EGCG is a PAIN compound. **(A)** Incubation of *human* HSP90 $\alpha$ -mNeonGreen (1  $\mu$ M) and p23-mScarlet-I (2  $\mu$ M) with 100  $\mu$ M EGCG (pink triangles) in reaction buffer containing 3 mM ATP leads to strong decrease in FRET emission ( $Em_{FRET}$ ) as well as donor emission ( $FL_{DD}$ ) compared to binding control (blue circles) and non-binding control (red squares). Both binding and non-binding control contained donor and acceptor in the same concentrations with 3 mM ATP or no ATP included in the buffer. **(B)** This leads to a negative  $Em_{FRET}/FL_{DD}$  quotient. If a compound prevents binding of HSP90 $\alpha$  and p23, both decrease in FRET emission and increase in donor emission occurs. The here observed effect of EGCG is attributed to unspecific effects such as covalent protein modifications. The same effect was observed on the binding of *C. albicans* HSP90 – Sba1 (data not shown). [R.F.U.] relative fluorescence units.

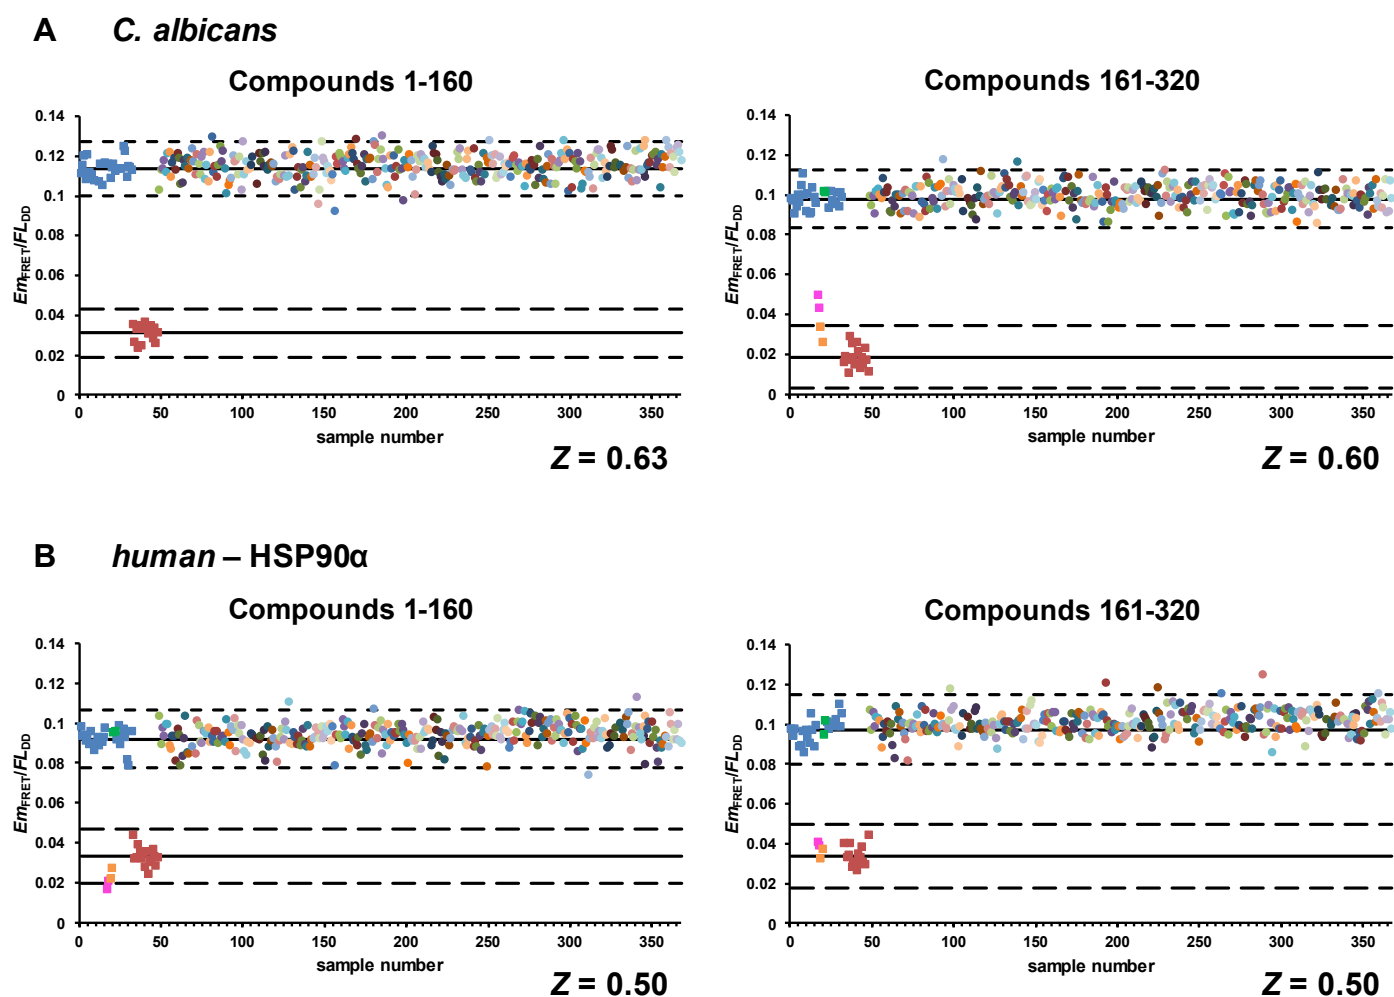

**Figure S4.** Screening of nucleoside-mimetics library. Individual samples. **(A)** *C. albicans* HSP90-mNeonGreen (1  $\mu$ M) and Sba1-mScarlet-I (2  $\mu$ M) were incubated with compounds (100  $\mu$ M, colored circles) in reaction buffer 1% DMSO, 3 mM ATP for 15 min at 30  $^{\circ}$ C prior to measurement. 3 mM ATP containing samples without compound (blue squares) and no ATP samples (red squares) served as binding and non-binding controls, respectively. The inhibition controls geldanamycin (pink squares) and luminespib (orange squares) were screened at concentrations of 100  $\mu$ M and 10  $\mu$ M, respectively. The non-inhibition control withaferin A (green squares) was screened at 10  $\mu$ M. **(B)** Screening for inhibition of *human* HSP90 $\alpha$ -mNeonGreen – p23-mScarlet-I binding was performed analogous, except for incubating at 37  $^{\circ}$ C prior to measurement. Each color represents the signal of a compound that was screened in duplicate. The shown Z-values were calculated based on individual well signal.

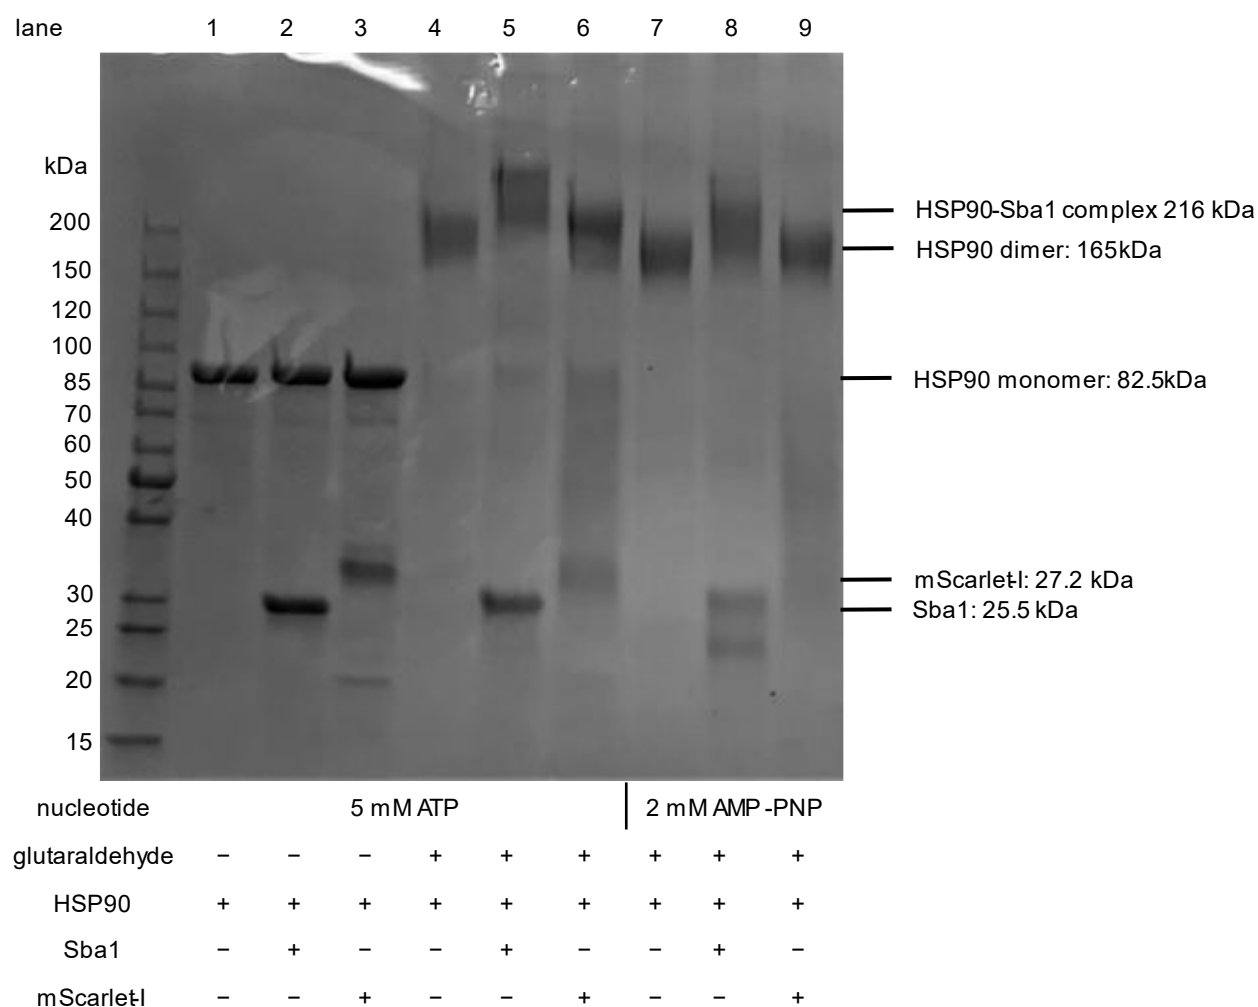

**Figure S5.** Confirmatory cross-linking SDS-PAGE of *C. albicans* HSP90 dimers and HSP90–Sba1 binding. The experiment was conducted analogously to Figure 6. Proteins were separated by SDS-PAGE without prior heating of samples followed by Coomassie staining. Lanes 1–3 not treated with glutaraldehyde show monomeric HSP90 (82.5 kDa) as well as Sba1 (25.5 kDa, lane 2) and mScarlet-I (27.2 kDa, lane 3). mScarlet-I was used as a negative control to show that cross-linking was specific for interacting proteins. Upon addition of glutaraldehyde higher molecular weight bands corresponding to homodimers of HSP90 (lane 4 and 7) as well as for HSP90–Sba1 complex (lane 5 and 8) could be observed, whereas no interaction between HSP90 and mScarlet-I was apparent (lane 6 and 9).

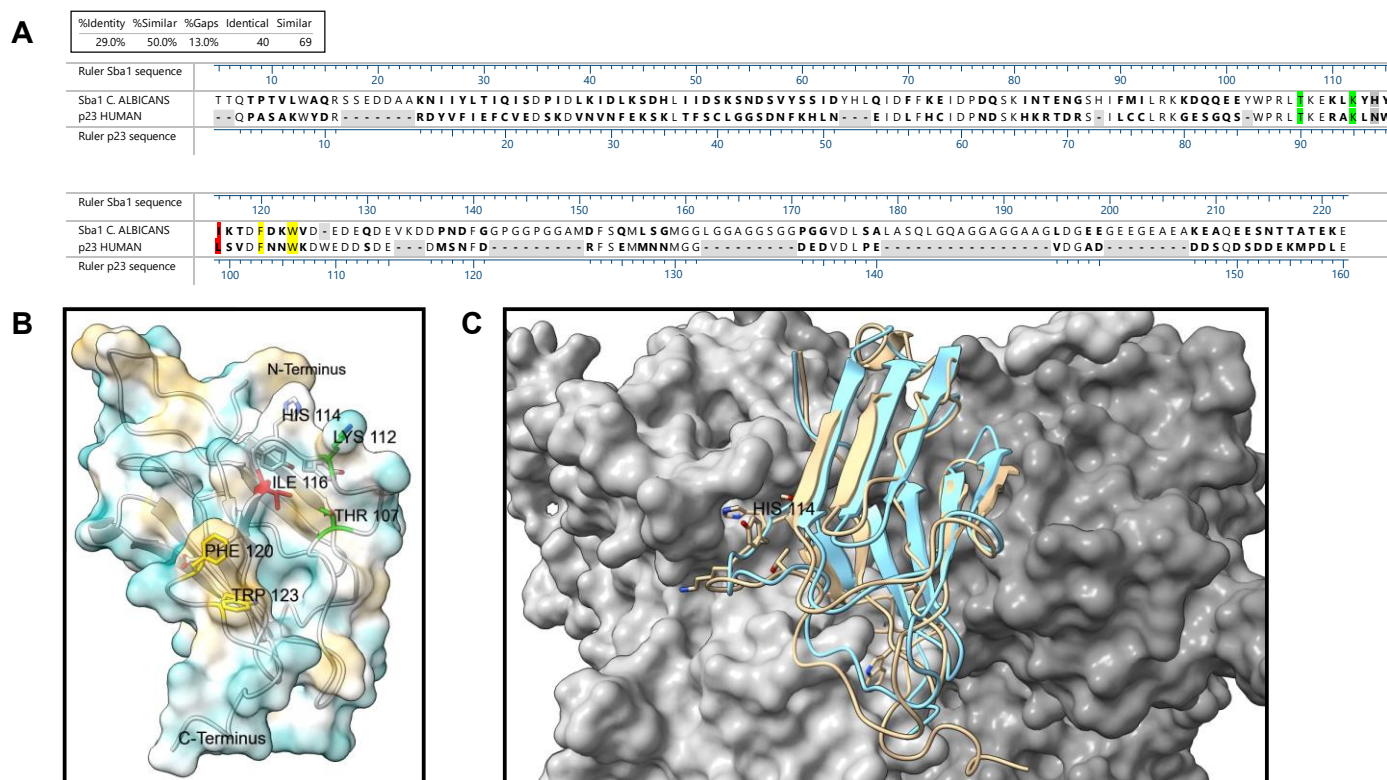

**Figure S6.** Potential for selective *C. albicans* Sba1 inhibitor development. **(A)** Sequence alignment of *C. albicans* Sba1 (UniProtKB: A0A1D8PQ94) with *human* p23 (Q15185). Amino acids that differ between compared sequences in bold. Sequences show low sequence identity and similarity between species. Residues important for p23/Sba1 binding to HSP90 marked yellow [55] and red [56]. Amino acids that are putatively involved in binding with the Sba1/p23 inhibitor gedunin highlighted in green [57]. **(B)** Homology model of *C. albicans* Sba1 based on crystal structure 2CG9. Hot spot amino acids involved in HSP90 or gedunin binding are colored in accordance with **(A)**. **(C)** Superimposition of homology model of *C. albicans* HSP90:Sba1 (based on 2CG9) with cryo-EM structure of *human* HSP90:p23 complex (7L7J). Whereas HSP90 sequence and structure are heavily conserved across species, Sba1 (beige) and p23 (light blue) show marked structural differences. HSP90 monomers shown in gray and dark gray. *C. albicans* His114 reaches into buried pocket of HSP90 and is not conserved, as are the amino acids in its vicinity (112-116). This could potentially be a target site for selective inhibitor development.

## A amino acids of ATP binding site

|                           |                                                                   |
|---------------------------|-------------------------------------------------------------------|
| [P46598]HSP90_C. ALBICANS | -----ADAKVETHEFTAEISQLMSLIINTVYSNKEIFLRELISNASDALKIRYQALSDPSQLES  |
| [P07900]HSP90A_HUMAN      | QPM-----EEEEVETFAFQAEIAQLMSLIINTFYSNKEIFLRELISNSDALKIRYESLTDPSKLD |
| [P08238]HSP90B_HUMAN      | -----EEEEVETFAFQAEIAQLMSLIINTFYSNKEIFLRELISNASDALKIRYESLTDPSKLD   |
| [P14625]ENPL_Grp94_HUMAN  | -----REKSEKFAFQAEVNRMMKLIINSLYKNKEIFLRELISNASDALKIRLISLTDENALSG   |
| [Q12931]TRAP1_HUMAN       | EPLHSIISSTESVQGSTSKHEFQAETKKLLDIVARSLYSEKEVFIRELISNASDALEKLRHKLVS |
| Sequence Ruler            | 10 20 30 40 50 60                                                 |

  

|                           |                                                                        |
|---------------------------|------------------------------------------------------------------------|
| [P46598]HSP90_C. ALBICANS | EPFLFIRIIPQKDQKVLERDSGIGMTKADLVNNGTIAKSGTKSFM---EALSAGADVSMIGQFGVGF    |
| [P07900]HSP90A_HUMAN      | GKELHINLIIPNKQDRTLTVDTGIGMTKADLVNNGTIAKSGTKAFM---EALQAGADISMIGQFGVGF   |
| [P08238]HSP90B_HUMAN      | GKELKIDIIIPNPQERTLTVDTGIGMTKADLVNNGTIAKSGTKAFM---EALQAGADISMIGQFGVGF   |
| [P14625]ENPL_Grp94_HUMAN  | NEELTVKIKCDKEKNLLHVTDTGVGMTREELVKNLGTIAKSGTSEFLNKMTAEAGGSGTSEFLNKMTAE  |
| [Q12931]TRAP1_HUMAN       | -PEMEIHLQNAEKGTITITQDTGIGMTQEELVSNLGTIARSGSKAFL---DALQNQAEASSKIGQFGVGF |
| Sequence Ruler            | 70 80 90 100 110 120 130                                               |

  

|                           |                                                                          |
|---------------------------|--------------------------------------------------------------------------|
| [P46598]HSP90_C. ALBICANS | YSLFLVADHVQYISKHNDDEQ--YVWESNAGGKFTVTLDENRERLGRGTMLRLFLKEDQLEYLEEKRIKEV  |
| [P07900]HSP90A_HUMAN      | YSAYLVAEKVTVITKHNDDEQ--YAWESSAGGSFTVRTD-TGEPMGRGTKVILHLKEDQTEYLEERRIKEI  |
| [P08238]HSP90B_HUMAN      | YSAYLVAEKVVVITKHNDDEQ--YAWESSAGGSFTVRAD-HGEPVIGRGTKVILHLKEDQTEYLEERRVKEV |
| [P14625]ENPL_Grp94_HUMAN  | YSAYLVAADKVIITSKHNNDTQ--HIWESDS-NEFSVIADPRGNTLGRGTTITLVLKEEASDYLELDTIKNL |
| [Q12931]TRAP1_HUMAN       | YSAFMVADRVESYRSAAAGSLGYQWLSDGSGVFIAEA-SG--VRTGTKKIILHLKSDCKEFSSEARVRDV   |
| Sequence Ruler            | 140 150 160 170 180 190 200                                              |

## B

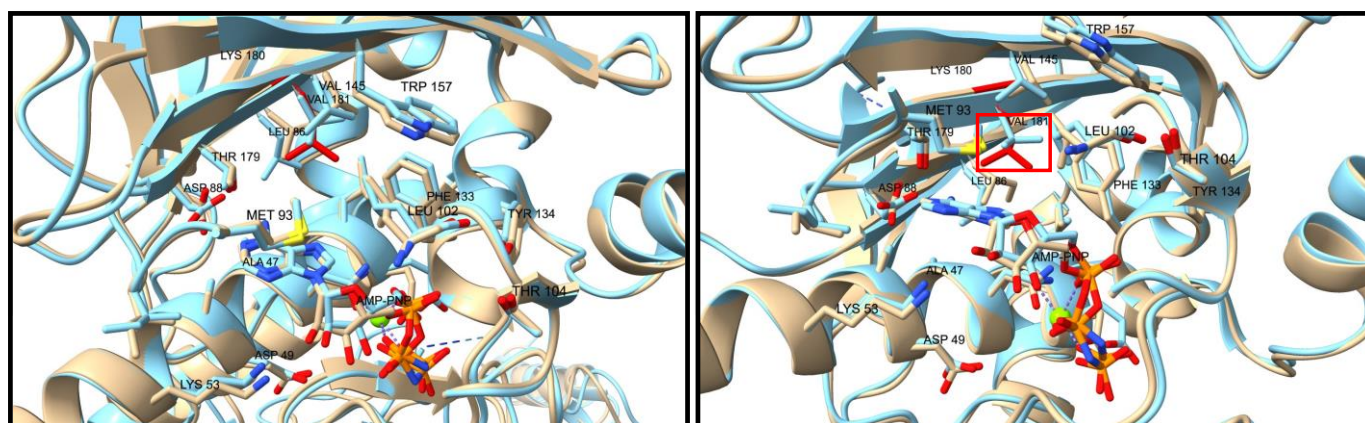

**Figure S7.** The nucleotide-binding site of *C. albicans* and *human* isoforms shows high degree of conservation and high structural similarity. **(A)** Sequence alignment of *C. albicans* HSP90 and the *human* isoforms of HSP90α, β, Grp94 and TRAP-1. Amino acids of the ATP binding site are highlighted in yellow according to Mishra *et al.* 2021 [71]. Only one amino acid of the binding site differs in *C. albicans* HSP90 when compared to the *human* isoforms (L176, corresponding to V181 for *human* HSP90β). This amino acid is highlighted with a red box. Five amino acid QEDGQ insertion into primary sequence of Grp94 highlighted in green. This insertion leads to a conformational change within the ATP-binding pocket of Grp94 that was exploited to develop an isoform-selective Grp94 inhibitor [72]. **(B)** Superimposition of cryo-EM structures of *S. cerevisiae* HSP90 (beige, PDB: 6XLC) and *human* HSP90β (light blue, PDB: 8EOB). Both structures were solved with HSP90 in the N-terminally dimerized conformation when bound to the non-hydrolysable ATP analogue AMP-PNP. Generally, also a high three-dimensional similarity in the conformation of involved amino acids is observed. Images show different angles of the ATP-binding site. The amino acid L176 is highlighted in red and marked with a red box in the second image. Analysis was performed with ChimeraX. **(A), (B)** Shown numeration of amino acids based on the *human* HSP90β sequence.

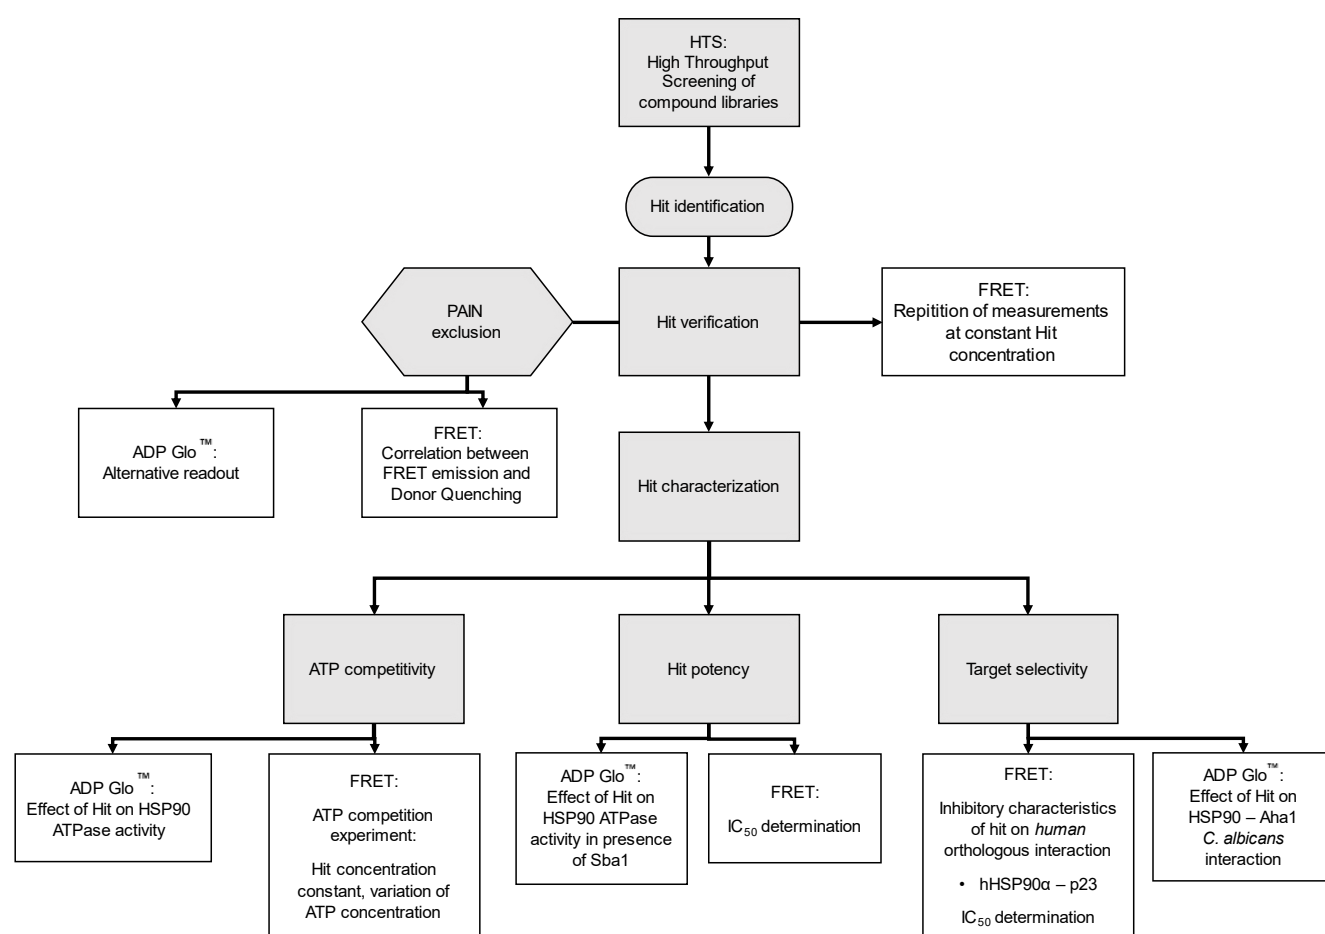

**Figure S8.** Workflow: Identification and profiling of inhibitors of *C. albicans* HSP90-Sba1 binding.



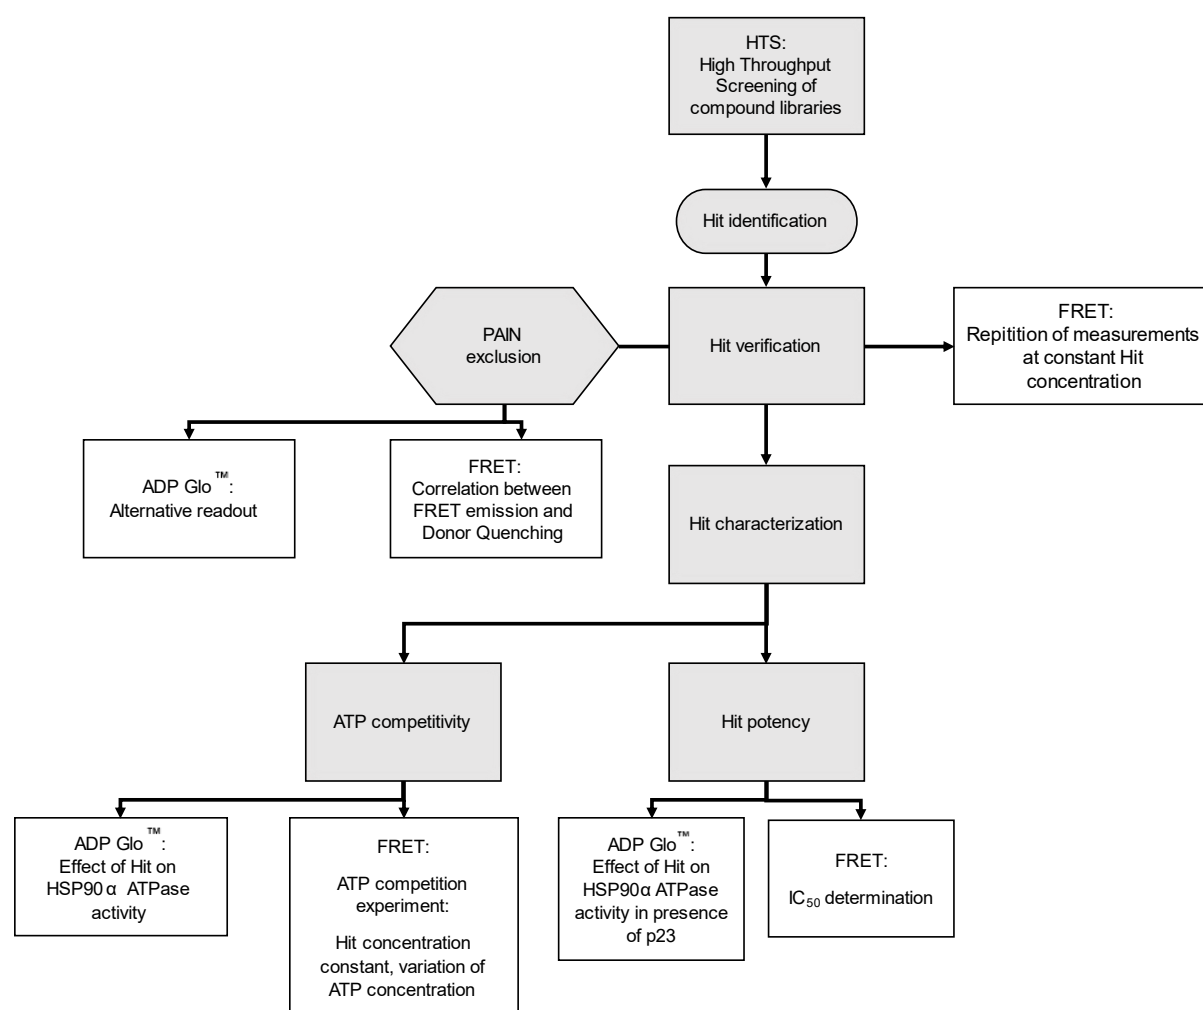

**Figure S9.** Workflow: Identification and profiling of inhibitors of *human* HSP90α-p23 binding.

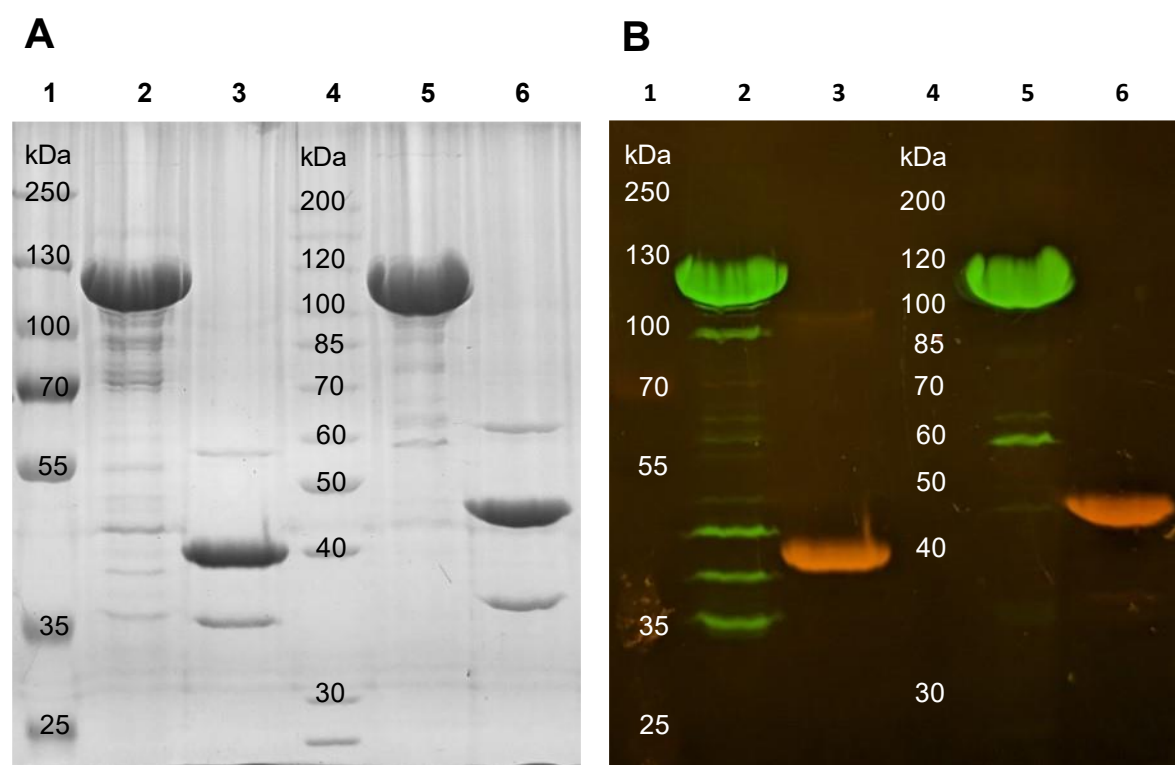

**Figure S10. SDS-PAGE and purity assessment of fusion proteins for  $K_d$  experiments.** Shown is the polyacrylamide gel (10%) after SDS-PAGE after Coomassie brilliant blue staining (**A**) and prior to staining under UV light (**B**) visualizing the fluorescence of the fluorescent fusion proteins. The purity of protein solutions was assessed via densitometric analysis of the Coomassie stained gel with ImageJ. The concentrations of  $L_0$  and  $T_0$  were corrected for the assessed purity prior to calculation of  $K_d$ . Lane 1: PAGE Ruler Prestained Plus. Lane 2: HSP90 $\alpha$ E47A-mNeonGreen (113 kDa), purity 78.5%. Lane 3: p23-mScarlet-I (47 kDa), purity 84.1%. Lane 4: PAGE Ruler Unstained. Lane 5: HSP90E36A-mNeonGreen (109 kDa), purity 91.5%. Lane 6: Sba1-mScarlet-I (52 kDa), purity 79.5%. Due to the proteins being at least still partly folded, the migration pattern on the gel can slightly differ from their actual molecular weights.

## Tables

**Table S1.** Characteristics of screened HSP90 inhibitors and their influence on HSP90 - Sba1/p23 binding according to literature.

| name                                  | $K_d$ value [nM]        | ATP competitive | Influence on p23/Sba1 binding | HSP90 binding site (domain) | Reference(s) |
|---------------------------------------|-------------------------|-----------------|-------------------------------|-----------------------------|--------------|
| Geldanamycin                          | 1200                    | Yes             | Yes                           | NTD                         | [82]         |
| Celastrol                             | NA                      | No              | No                            | CTD                         | [40], [83]   |
| Radicicol                             | 19                      | Yes             | Yes                           | NTD                         | [82]         |
| NVP-AUY922 (luminespib)               | 1.7                     | Yes             | Yes                           | NTD                         | [76], [84]   |
| Snx-5422                              | 16                      | Yes             | Yes                           | NTD                         | [78]         |
| BIIB021                               | $1.7 \pm 0.4$ ( $K_i$ ) | Yes             | Yes                           | NTD                         | [85]         |
| Silibinin                             | NA                      | NA              | NA                            | CTD                         | [86]         |
| Deguelin                              | NA                      | No              | NA                            | CTD                         | [87], [88]   |
| Withaferin A                          | NA                      | No              | No                            | CTD                         | [41]         |
| (-)-Epigallocatechin-3-gallate (EGCG) | NA                      | No              | Yes                           | CTD                         | [42], [43]   |

NA: not available; NTD: N-terminal domain; CTD: C-terminal domain

**Table S2.** Compound list of nucleoside-mimetic library

| # | Structure                                                                                                                                                        |
|---|------------------------------------------------------------------------------------------------------------------------------------------------------------------|
| 1 | 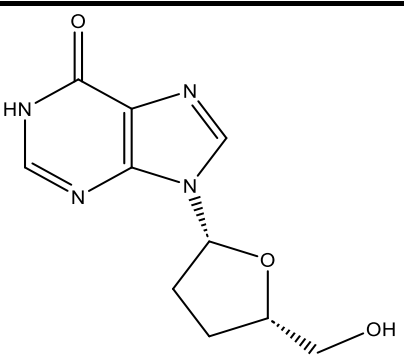<br><chem>OC[C@H]1CC[C@H](O1)N2C=NC=3C(=O)NC=NC23</chem>                        |
| 2 | <br><chem>CCCCCOC(=O)NC1=NC(=O)N(C=C1F)[C@@H]2O[C@H](C)[C@@H](O)[C@H]2O</chem> |
| 3 | <br><chem>FC1=CN(C2CCCO2)C(=O)N(CC(=O)NC3CCCC=4C=CC=CC34)C1=O</chem>          |
| 4 | <br><chem>O=C1NC(=O)N(CCCN2CCC=3C=CC=CC23)C=C1C#N</chem>                      |
| 5 | <br><chem>CN1C=C(CNC(=O)CC2CCCCC2)C(=O)NC1=O</chem>                           |

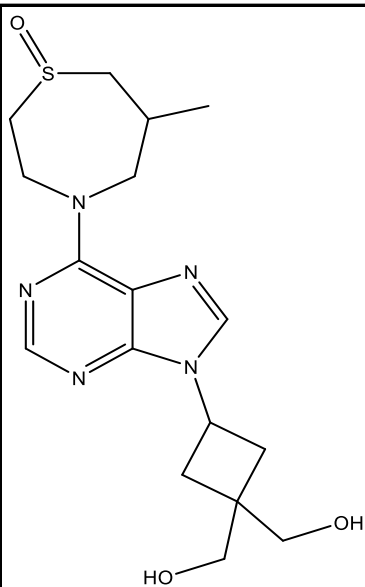

6 CC1CN(CCS(=O)C1)C=2N=CN=C3N(C=NC23)C4CC(CO)(CO)C4

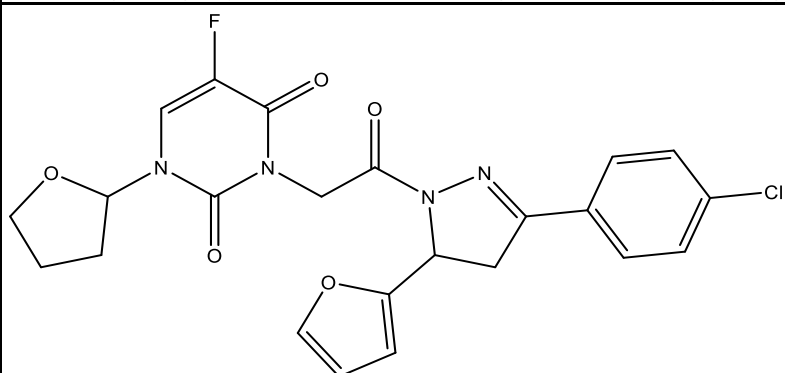

7 FC1=CN(C2CCCO2)C(=O)N(CC(=O)N3N=C(CC3C4=CC=CO4)C=5C=CC(Cl)=CC5)C1=O

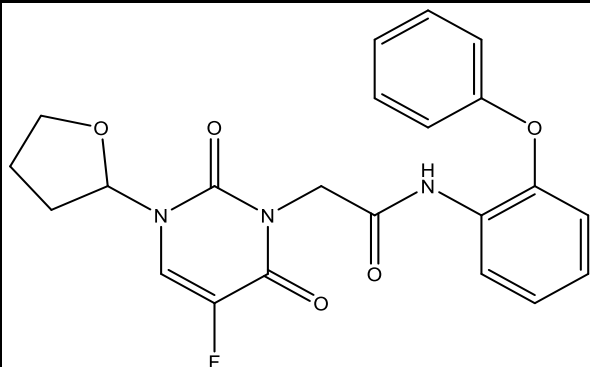

8 FC1=CN(C2CCCO2)C(=O)N(CC(=O)NC=3C=CC=CC3OC=4C=CC=CC4)C1=O

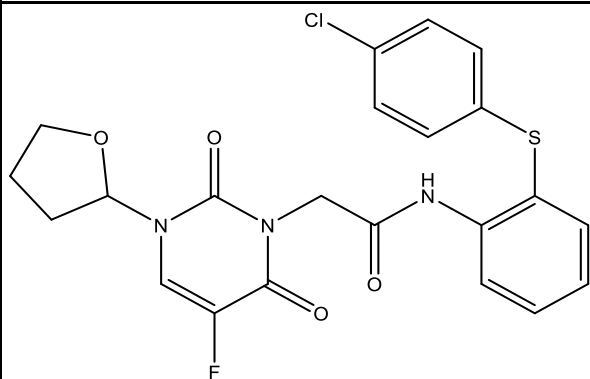

9 FC1=CN(C2CCCO2)C(=O)N(CC(=O)NC=3C=CC=CC3SC=4C=CC(Cl)=CC4)C1=O

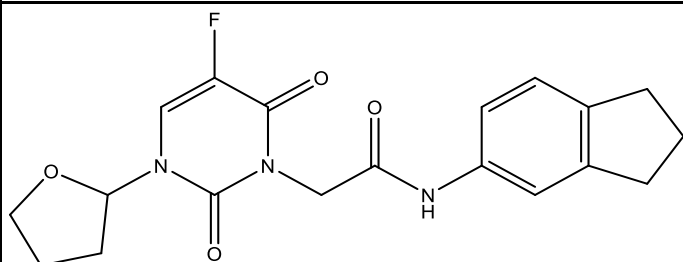

10 FC1=CN(C2CCCO2)C(=O)N(CC(=O)NC=3C=CC=4CCCC4C3)C1=O

|  |                                                                                                                                                                                |
|--|--------------------------------------------------------------------------------------------------------------------------------------------------------------------------------|
|  | 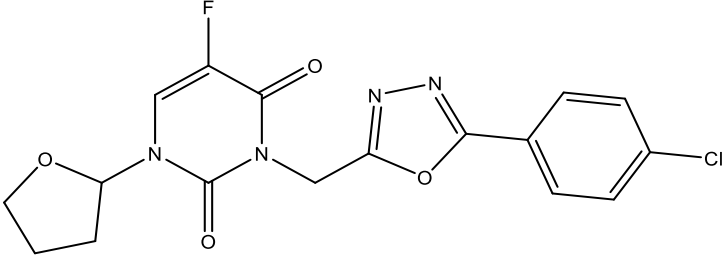 <p>11 <chem>FC1=CN(C2CCCO2)C(=O)N(CC3=NN=C(O3)C=4C=CC(Cl)=CC4)C1=O</chem></p>               |
|  |  <p>12 <chem>FC1=CN(C2CCCO2)C(=O)N(CC(=O)NC=3C=CC(=CC3)S(=O)(=O)N4CCCC4)C1=O</chem></p>      |
|  |  <p>13 <chem>FC1=CN(C2CCCO2)C(=O)N(CC(=O)N3CCC=4C=CC=CC34)C1=O</chem></p>                    |
|  |  <p>14 <chem>COC=1C=CC=CC1NC(=O)C=2C=CC(NC(=O)CN3C(=O)C(F)=CN(C4CCCO4)C3=O)=CC2</chem></p> |
|  |  <p>15 <chem>FC1=CN(C2CCCO2)C(=O)N(CC3=NN=C(O3)C=4C=CC(Br)=CC4)C1=O</chem></p>             |
|  |  <p>16 <chem>FC1=CN(C2CCCO2)C(=O)N(CC=3C=CC=4C=CC=CC4N3)C1=O</chem></p>                     |
|  |  <p>17 <chem>O=C(CN1C=CC(=O)NC1=O)NC=2C=CC=CC2</chem></p>                                   |

|  |                                                                                                                                                                      |
|--|----------------------------------------------------------------------------------------------------------------------------------------------------------------------|
|  | 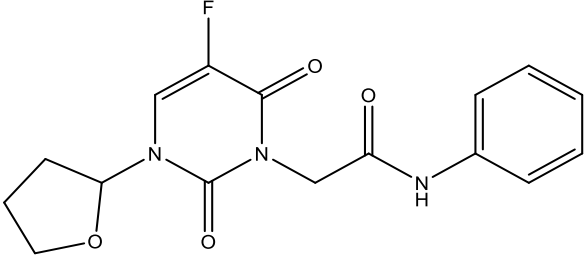 <p>18 <chem>FC1=CN(C2CCCO2)C(=O)N(CC(=O)NC3=CC=CC=C3)C1=O</chem></p>               |
|  |  <p>19 <chem>COC=C1C=CC(C)=CC1C(C)NC(=O)CN2C(=O)C(F)=CN(C3CCCO3)C2=O</chem></p>    |
|  |  <p>20 <chem>CC(NC(=O)CN1C(=O)C(F)=CN(C2CCCO2)C1=O)C3=CC=CO3</chem></p>            |
|  |  <p>21 <chem>CS(=O)(=O)N1CCN(CC1)C(=O)CN2C(=O)C(F)=CN(C3CCCO3)C2=O</chem></p>     |
|  |  <p>22 <chem>FC1=CN(C2CCCO2)C(=O)N(CC=3C=CC=C(C#N)C3)C1=O</chem></p>              |
|  |  <p>23 <chem>COCCN1C(=O)C(C#N)=CN(C2CC2)C1=O</chem></p>                           |
|  |  <p>24 <chem>CC=1C=CC=C(NC(=O)CNC(=O)CN2C(=O)C(F)=CN(C3CCCO3)C2=O)C1C</chem></p> |

|    |                                                                                      |
|----|--------------------------------------------------------------------------------------|
|    | 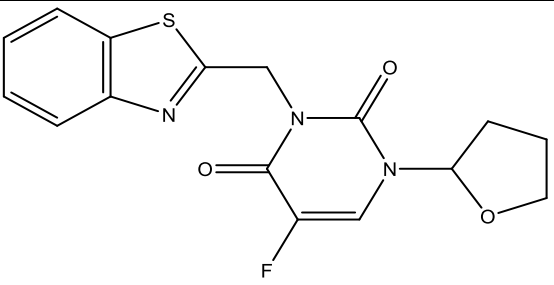    |
| 25 | <chem>FC1=CN(C2CCCO2)C(=O)N(CC3=NC=4C=CC=CC4S3)C1=O</chem>                           |
|    |     |
| 26 | <chem>CN1C=C(C(=O)NC(C2CC2)C3CC3)C(=O)NC1=O</chem>                                   |
|    |    |
| 27 | <chem>CCCC(C)NC(=O)CN1C=CC(=O)NC1=O</chem>                                           |
|    |   |
| 28 | <chem>OC[C@H]1O[C@H](C[C@@H]1O)N2C=C(F)C(=O)NC2=O</chem>                             |
|    |   |
| 29 | <chem>CCN(CC)C=1C=CC(CN2C=C(C#N)C(=O)NC2=O)=CN1</chem>                               |
|    |  |
| 30 | <chem>CC=1C=CC(NCCCN2C=C(C#N)C(=O)NC2=O)=NC1</chem>                                  |
|    |   |
| 31 | <chem>O=C(CN1C=CC(=O)NC1=O)NC2CCCC2</chem>                                           |
|    |   |
| 32 | <chem>CCCC(C)(C)NC(=O)CN1C=CC(=O)NC1=O</chem>                                        |



|  |                                                                                                                                                                              |
|--|------------------------------------------------------------------------------------------------------------------------------------------------------------------------------|
|  | 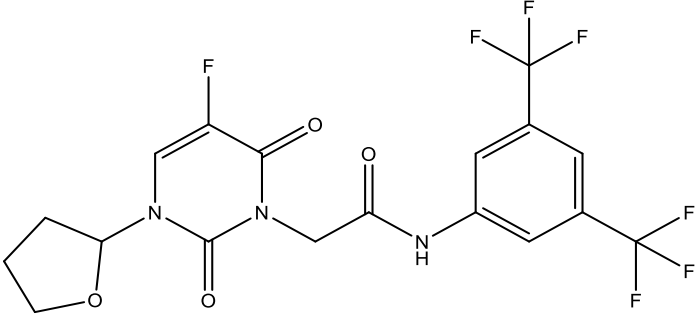 <p>33 <chem>FC1=CN(C2CCCCO2)C(=O)N(CC(=O)NC=3C=C(C=C(C3)C(F)(F)F)C(F)(F)F)C1=O</chem></p> |
|  |  <p>34 <chem>FC1=CN(C2CCCCO2)C(=O)N(CC(=O)C=3C=CC(Br)=CC3)C1=O</chem></p>                   |
|  |  <p>35 <chem>COCC(C)N1C(C)=CC(C(=O)CN2C(=O)C(F)=CN(C3CCCCO3)C2=O)=C1C</chem></p>          |
|  |  <p>36 <chem>CN1C(=O)C=CN(CC(=O)NCC(F)(F)F)C1=O</chem></p>                                |
|  |  <p>37 <chem>CC(=O)OCC1OC(C(OC(=O)C)C1OC(=O)C)N2C(Br)=NC=3C(N)=NC=NC23</chem></p>         |

|    |                                                                                      |
|----|--------------------------------------------------------------------------------------|
|    | 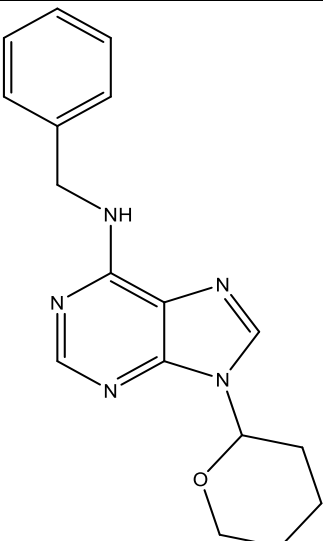    |
| 38 | <chem>C(NC=1N=CN=C2N(C=NC12)C3CCCCO3)C=4C=CC=CC4</chem>                              |
|    |   |
| 39 | <chem>FC1=CN(C2CCCCO2)C(=O)N(CC(=O)NCC=3C=CC=4OCOC4C3)C1=O</chem>                    |
|    |  |
| 40 | <chem>CC1=CC(C(=O)CN2C(=O)C(F)=CN(C3CCCCO3)C2=O)=C(C)N1CC4=CC=CO4</chem>             |
|    |  |
| 41 | <chem>FC1=CN(C2CCCCO2)C(=O)N(CC(=O)NC=3C=CC=4OCOC4C3)C1=O</chem>                     |
|    |   |
| 42 | <chem>CCC(C)(C)NC(=O)CN1C=CC(=O)NC1=O</chem>                                         |
|    |   |
| 43 | <chem>CCC(C)NC(=O)CN1C=CC(=O)N(C)C1=O</chem>                                         |

|    |                                                                                      |
|----|--------------------------------------------------------------------------------------|
|    | 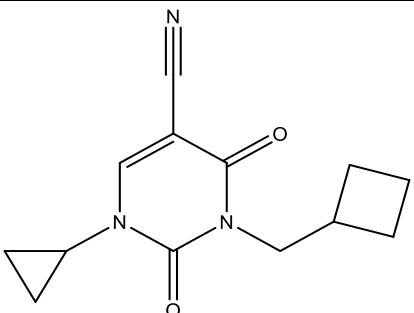    |
| 44 | <chem>O=C1C(C#N)=CN(C2CC2)C(=O)N1CC3CCCC3</chem>                                     |
|    |     |
| 45 | <chem>CCN1C=C(CNC(=O)C(F)C(F)(F)F)C(=O)NC1=O</chem>                                  |
|    |    |
| 46 | <chem>CC1CN(CCN1CC(F)(F)F)C(=O)CN2C=CC(=O)NC2=O</chem>                               |
|    |  |
| 47 | <chem>CCNC(=O)N1CCN(CC1)C(=O)CN2C=CC(=O)NC2=O</chem>                                 |
|    |   |
| 48 | <chem>O=C(CN1C=CC(=O)NC1=O)N2CCNC(=O)C2</chem>                                       |
|    |   |
| 49 | <chem>CCN(CC)C(=O)N1CCN(CC2=CC(=O)N(C)C(=O)N2C)CC1</chem>                            |
|    |  |
| 50 | <chem>CC1=CN(C2CC(O)C(CO)O2)C(=O)N(CC(=O)N3CCC=4C=C(C=CC34)[N+](=O)[O-])C1=O</chem>  |

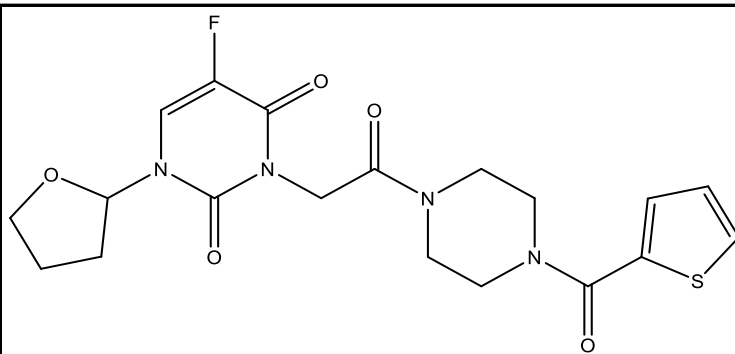FC1=CN(C2CCCO2)C(=O)N(CC(=O)N3CCN(CC3)C(=O)C4=CC=CS4)C1=O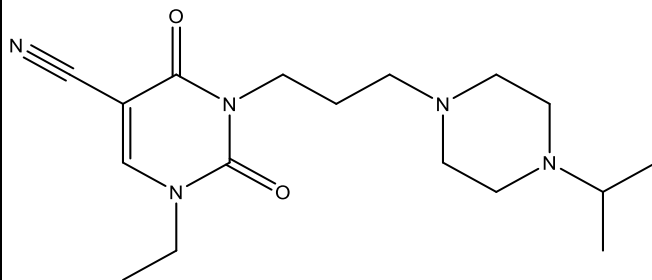

52 | CCN1C=C(C#N)C(=O)N(CCCN2CCN(CC2)C(C)C)C1=O

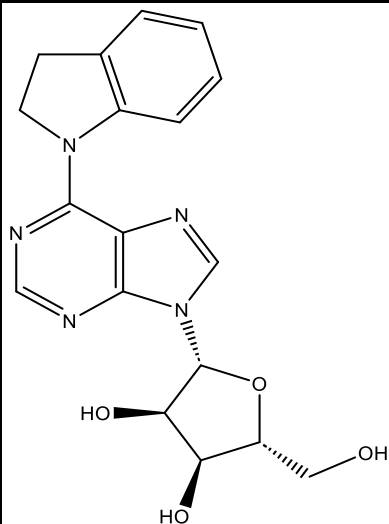53OC[C@H]1O[C@H]([C@H](O)[C@@H]1O)N2C=NC=3C(=NC=NC23)N4CCC=5C=CC=CC45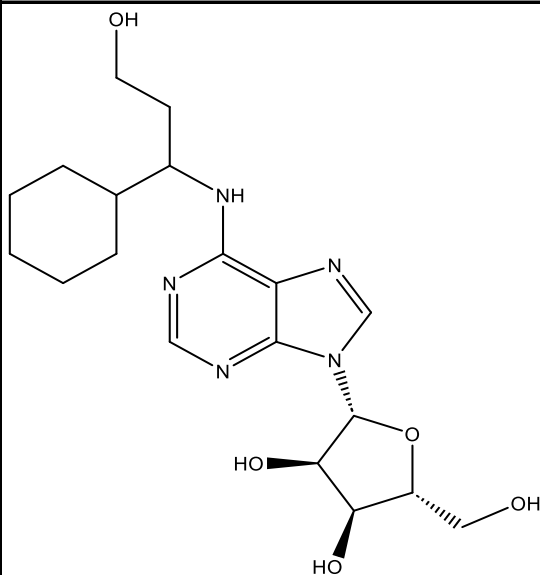

54 | OCCC(NC=1N=CN=C2N(C=NC12)[C@@H]3O[C@H](CO)[C@@H](O)[C@H]3O)C4CCCCC4

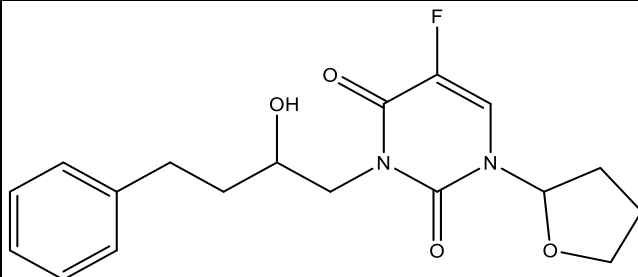

55 | OC(CCC=1C=CC=CC1)CN2C(=O)C(F)=CN(C3CCCO3)C2=O

|           |                                                                                                                                                                  |
|-----------|------------------------------------------------------------------------------------------------------------------------------------------------------------------|
| <p>56</p> | 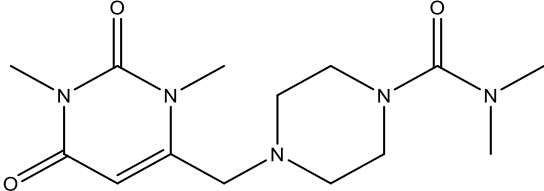 <p><chem>CN(C)C(=O)N1CCN(CC2=CC(=O)N(C)C(=O)N2C)CC1</chem></p>                 |
| <p>57</p> |  <p><chem>O=C1CCCN1CCCN2C(=O)C(C#N)=CN(C3CC3)C2=O</chem></p>                    |
| <p>58</p> |  <p><chem>CC=1C=C(CN2C(=O)C(C)=CN(C3CC(O)C(CO)O3)C2=O)C=4C=CC=CC4N1</chem></p> |
| <p>59</p> |  <p><chem>CN1C(CN2CCN(CCO)CC2)=CC(=O)N(C)C1=O</chem></p>                      |
| <p>60</p> |  <p><chem>CCCN1CCN(CC2=CC(=O)N(C)C(=O)N2C)CC1</chem></p>                      |
| <p>61</p> |  <p><chem>CCN1C=C(C#N)C(=O)N(CC(O)CN2CCC(C)CC2)C1=O</chem></p>                |
| <p>62</p> |  <p><chem>O=C(CCN1C(=O)C(C#N)=CN(C2CC2)C1=O)NC=3C=CC=CC3</chem></p>           |

|    |                                                                                                                                                           |
|----|-----------------------------------------------------------------------------------------------------------------------------------------------------------|
|    | 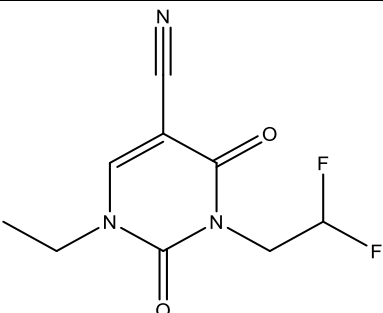<br><chem>CCN1C=C(C#N)C(=O)N(CC(F)F)C1=O</chem>                          |
| 63 |                                                                                                                                                           |
|    | <br><chem>Cl.NC=1C=CC=C(N1)C(=O)N2CCCC2CO</chem>                         |
| 64 |                                                                                                                                                           |
|    | <br><chem>CC1=CN(C2CC(O)C(CO)O2)C(=O)NC1=O</chem>                       |
| 65 |                                                                                                                                                           |
|    | <br><chem>NC=1N=CN=C2N(C=NC12)[C@@H]3O[C@H](CO)[C@@H](O)[C@H]3O</chem> |
| 66 |                                                                                                                                                           |
|    | <br><chem>CCN1C=C(C#N)C(=O)N(CCCNC(=O)C2CCCC2)C1=O</chem>              |
| 67 |                                                                                                                                                           |
|    | <br><chem>O=C(CN1C=CC(=O)NC1=O)NC2CCCCC2</chem>                        |
| 68 |                                                                                                                                                           |
|    | <br><chem>CC(=O)OCCOCN1C=NC=2C(=O)NC(N)=NC12</chem>                    |
| 69 |                                                                                                                                                           |

|    |                                                                            |
|----|----------------------------------------------------------------------------|
|    | <br>HCl                                                                    |
| 70 | <chem>Cl.CN1[C@@H]([C@H]([C@@H](O)C1=O)C(=O)O)C=2C=NN(C)C2</chem>          |
|    |                                                                            |
| 71 | <chem>NC=1N=CC=C(N1)N2CCCC2CO</chem>                                       |
|    |                                                                            |
| 72 | <chem>FC1=CN(C2CCCO2)C(=O)N(CC(=O)N3CCC(CC=4C=CC=CC4)CC3)C1=O</chem>       |
|    |                                                                            |
| 73 | <chem>CC1=CC(C(=O)CN2C(=O)C(F)=CN(C3CCCO3)C2=O)=C(C)N1CC4=CC=CS4</chem>    |
|    |                                                                            |
| 74 | <chem>FC1=CN(C2CCCO2)C(=O)NC1=O</chem>                                     |
|    |                                                                            |
| 75 | <chem>CC1=CN(C2OC(COC(=O)C=3C=CC=CC3)C(O)C2O)C(=O)NC1=O</chem>             |
|    |                                                                            |
| 76 | <chem>FC1=CN(C2CCCO2)C(=O)N(CC(=O)N(CCC=3C=CC=CC3)CC=4C=CC=CC4)C1=O</chem> |

|    |                                                                                |
|----|--------------------------------------------------------------------------------|
|    |                                                                                |
| 77 | <chem>CC(=O)OCC1OC(C(OC(=O)C)C1OC(=O)C)N2C(=NC=3C(N)=NC=NC23)S(=O)(=O)C</chem> |
|    |                                                                                |
| 78 | <chem>CN1CCN(CC=2C=CC(CN3C=C(C#N)C(=O)NC3=O)=CC2)CC1</chem>                    |
|    |                                                                                |
| 79 | <chem>OCC1(CN2C=NC=3C(=NC=NC23)N4CN(CC5CC5)C(=O)C4)CCOCC1</chem>               |
|    |                                                                                |
| 80 | <chem>NC=1N=CN=C2N(C3CC(O)C(CO)O3)C(Br)=NC12</chem>                            |
|    |                                                                                |
| 81 | <chem>Cl.OCC1CC(N(C1)C=2C=CN=CN2)C(=O)O</chem>                                 |
|    |                                                                                |
| 82 | <chem>OCCOCN1C=C(CC=2C=CC=CC2)C(=O)NC1=O</chem>                                |



|    |                                                                                     |
|----|-------------------------------------------------------------------------------------|
|    | 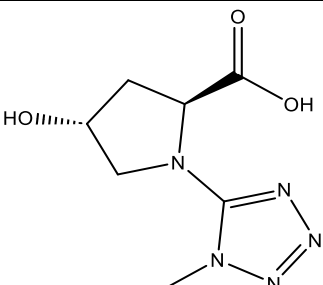   |
| 83 | <chem>CN1N=NN=C1N2C[C@H](O)C[C@H]2C(=O)O</chem>                                     |
|    |    |
| 84 | <chem>Cl.Cl.OC1(CN2C=CN=N2)CCNC1</chem>                                             |
|    |   |
| 85 | <chem>NC1=NC(=O)N(C=C1F)[C@@H]2CS[C@H](CO)O2</chem>                                 |
|    |  |
| 86 | <chem>NC=1N=C(F)N=C2N(C=NC12)[C@@H]3O[C@H](CO)[C@@H](O)[C@@H]3O</chem>              |
|    |  |
| 87 | <chem>OC1(CCNC1)C2=CC=NN2</chem>                                                    |
|    |  |
| 88 | <chem>[Li+].CN1C=C(CN2CCC(O)C2)C(=N1)C(=O)[O-]</chem>                               |
|    |  |
| 89 | <chem>Cl.OC1CC(N(C1)C=2N=CN=C3N=CNC23)C(=O)O</chem>                                 |

|    |                                                                                      |
|----|--------------------------------------------------------------------------------------|
|    | 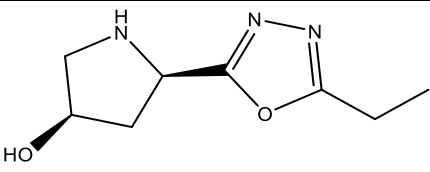    |
| 90 | <chem>CCC1=NN=C(O1)[C@H]2C[C@@H](O)CN2</chem>                                        |
|    |     |
| 91 | <chem>[K+].O[C@H]1CCN(CC2=NC(=CO2)C(=O)[O-])C1</chem>                                |
|    |    |
| 92 | <chem>Cl.Cl.OC1(CN2CCC(CC2)OC=3C=CC=C(C3)C(F)(F)F)CCNC1</chem>                       |
|    |    |
| 93 | <chem>NC=1N=CC=C(N1)N2CCC(O)C2</chem>                                                |
|    |   |
| 94 | <chem>Cl.Cl.CCC1=NC(=NN1)[C@@H]2C[C@@H](O)CN2</chem>                                 |
|    |   |
| 95 | <chem>Cl.CN1C=C(N)C(=N1)C(=O)N2CCCC2CO</chem>                                        |
|    |   |
| 96 | <chem>CC1=CN([C@@H]2C[C@@H](O)[C@H](CO)O2)C(=O)NC1=O</chem>                          |
|    |   |
| 97 | <chem>CC(C)N1C=C(C=N1)[C@@H]2CNC[C@H]2CO</chem>                                      |
|    |  |
| 98 | <chem>Cl.CC(C)[C@H](N)C(=O)OCCOCN1C=NC=2C(=O)NC(N)=NC12</chem>                       |

|  |                                                                                     |     |                                                                                 |
|--|-------------------------------------------------------------------------------------|-----|---------------------------------------------------------------------------------|
|  | 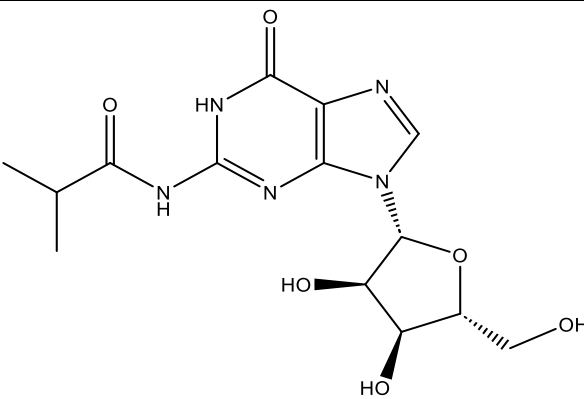   | 99  | <chem>CC(C)C(=O)NC1=NC=2N(C=NC2C(=O)N1)[C@@H]3O[C@H](CO)[C@@H](O)[C@H]3O</chem> |
|  |   | 100 | <chem>OC[C@H]1O[C@H]([C@H](O)[C@@H]1O)N2C=NC=3C(Cl)=NC=NC23</chem>              |
|  |  | 101 | <chem>OC(=O)CN1C(=O)C(F)=CN(C2CCCO2)C1=O</chem>                                 |
|  |  | 102 | <chem>NC=1C=CN([C@@H]2O[C@H](CO)[C@@H](O)[C@@H]2O)C(=O)N1</chem>                |
|  |  | 103 | <chem>Cl.NCC1=CN(CC(F)(F)F)C(=O)NC1=O</chem>                                    |
|  |  | 104 | <chem>COC=1C=CC(CNC=2N=C(N=CC2C(=O)NCC=3N=CC=CN3)N4CCC[C@H]4CO)=CC1Cl</chem>    |
|  |  | 105 | <chem>Cl.Cl.O[C@H]1CN[C@@H](C1)C2=NNC(=N2)C=3C=CC=CC3</chem>                    |

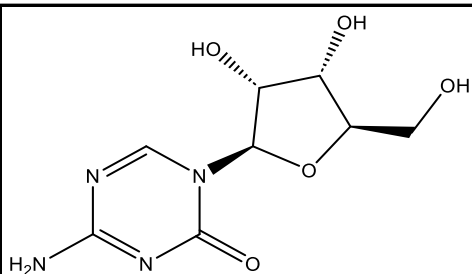

106 | NC=1N=CN([C@@H]2O[C@H](CO)[C@@H](O)[C@H]2O)C(=O)N1

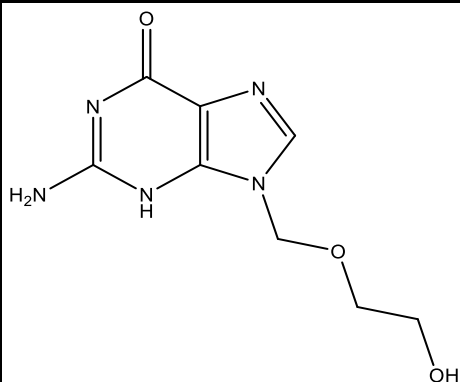

107 | NC1=NC(=O)C=2N=CN(COCCO)C2N1

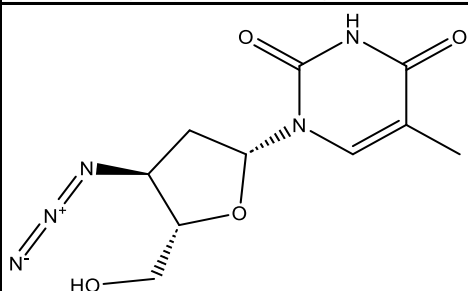

108 CC1=CN([C@H]2C[C@H](N=[N+]=[N-])[C@@H](CO)O2)C(=O)NC1=O

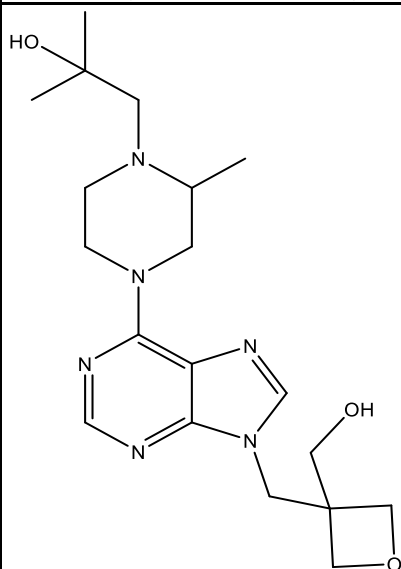

109 | CC1CN(CCN1CC(C)(C)O)C=2N=CN=C3N(CC4(CO)COC4)C=NC23

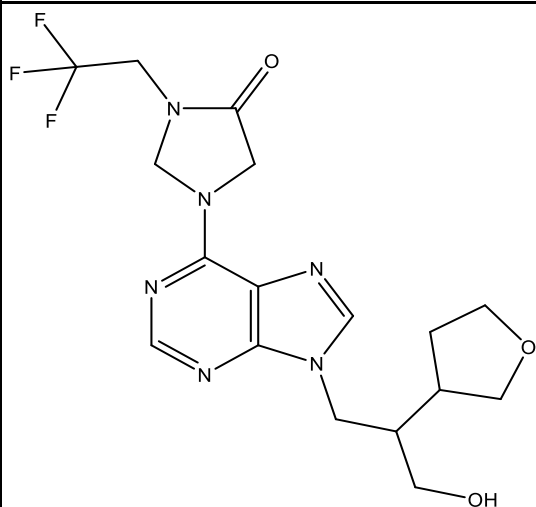

110 | OCC(CN1C=NC=2C(=NC=NC12)N3CN(CC(F)(F)F)C(=O)C3)C4CCOC4

|     |                                                                                     |
|-----|-------------------------------------------------------------------------------------|
|     | 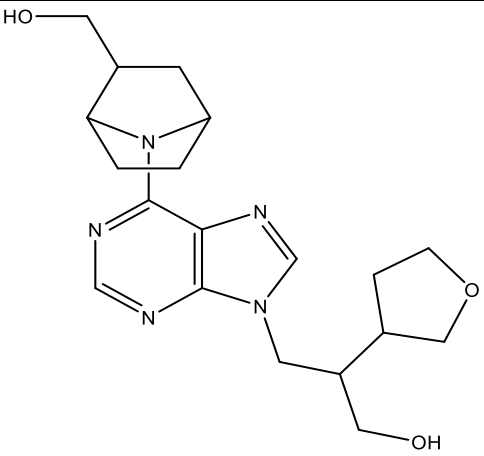   |
| 111 | <chem>OCC(CN1C=NC=2C(=NC=NC12)N3C4CCC3C(CO)C4)C5CCOC5</chem>                        |
|     |   |
| 112 | <chem>CN(CCO)C1CCN(CC1)C=2N=CN=C3N(CC4(O)CCOC4)C=NC23</chem>                        |
|     |  |
| 113 | <chem>CC1OCCC1(O)CN2C=NC=3C(=NC=NC23)N4C[C@H](F)C[C@H]4C(=O)N</chem>                |
|     |  |
| 114 | <chem>COCCN(CCC#N)C=1N=CN=C2N(CC3(O)CCOC3C)C=NC12</chem>                            |
|     |  |
| 115 | <chem>CC(C)N1C=C(CNC(=O)N2CCOC[C@H]2C)C(=O)NC1=O</chem>                             |

|     |                                                                                      |
|-----|--------------------------------------------------------------------------------------|
|     | 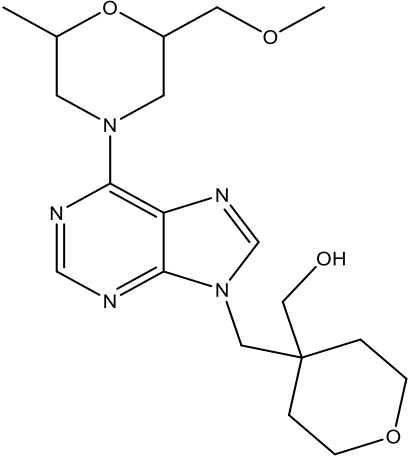    |
| 116 | <chem>COCC1CN(CC(C)O1)C=2N=CN=C3N(CC4(CO)CCOCC4)C=NC23</chem>                        |
|     |   |
| 117 | <chem>CCNC(=O)CN(CC)C=1N=CN=C2N(CC3(O)CCOCC3)C=NC12</chem>                           |
|     |   |
| 118 | <chem>OC1(CN2C=NC=3C(=NC=NC23)N4CCN(CC4)C(=O)CC#N)CCOC1</chem>                       |
|     |   |
| 119 | <chem>OCC1(CN2C=NC=3C(=NC=NC23)N4CCCC4C5COCCC5O)CCOCC1</chem>                        |
|     |  |
| 120 | <chem>CCOCCO[C@H]1CCN(C1)C=2N=CN=C3N(CC(O)C4CCCO4)C=NC23</chem>                      |

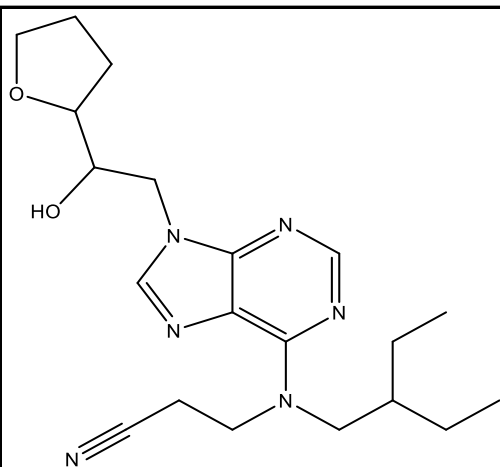

121 CCC(CC)CN(CCC#N)C=1N=CN=C2N(CC(O)C3CCCO3)C=NC12

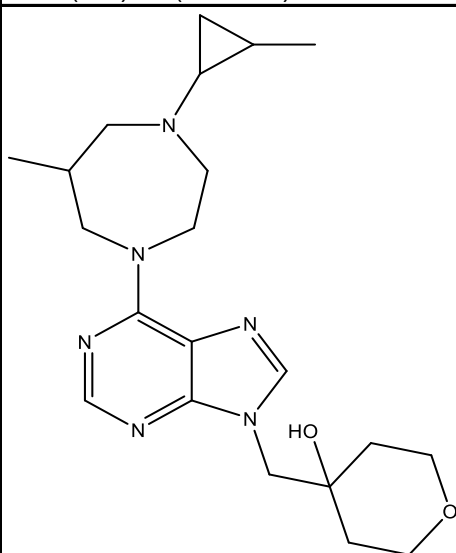

122 CC1CC1N2CCN(CC(C)C2)C=3N=CN=C4N(CC5(O)CCOCC5)C=NC34

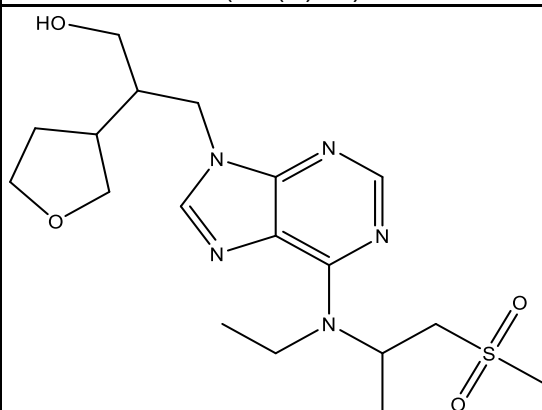

123 CCN(C(C)CS(=O)(=O)C)C=1N=CN=C2N(CC(CO)C3CCOC3)C=NC12

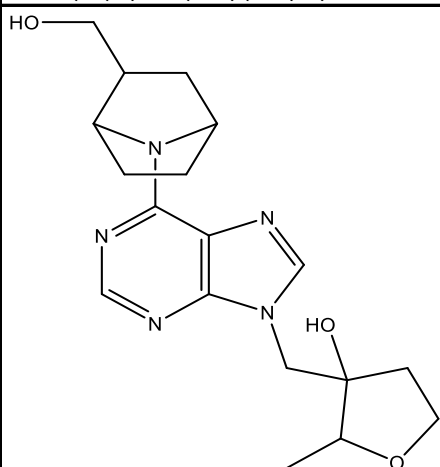

124 CC1OCCC1(O)CN2C=NC=3C(=NC=NC23)N4C5CCC4C(CO)C5

|  |                                                                                                                                                                             |
|--|-----------------------------------------------------------------------------------------------------------------------------------------------------------------------------|
|  | 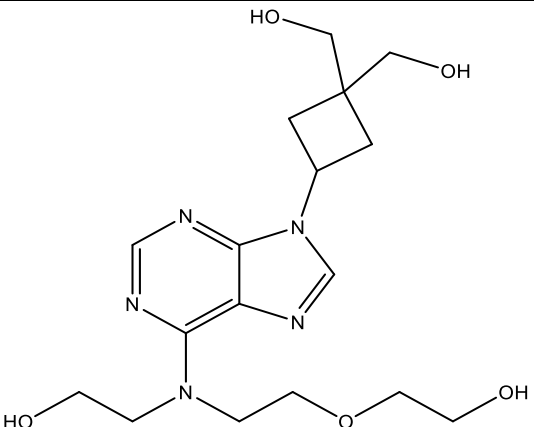 <p>125 <chem>OCCOCCN(CCO)C=1N=CN=C2N(C=NC12)C3CC(CO)(CO)C3</chem></p>                     |
|  |  <p>126 <chem>CN1CCC2C(CCCN2C=3N=CN=C4N(C=NC34)C5CC(CO)(CO)C5)C1</chem></p>               |
|  |  <p>127 <chem>CN(C)CCN1CCCN(CC1)C=2N=CN=C3N(CC(O)C4CCCO4)C=NC23</chem></p>               |
|  |  <p>128 <chem>FC1=CN(C2CCCO2)C(=O)N(CC(=O)C3=C(NC=4C=CC=CC34)C=5C=CC=CC5)C1=O</chem></p> |



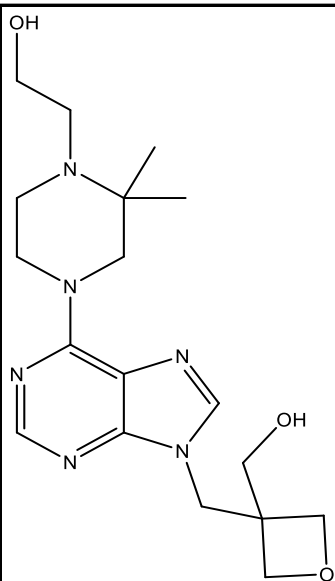

129 CC1(C)CN(CCN1CCO)C=2N=CN=C3N(CC4(CO)COC4)C=NC23

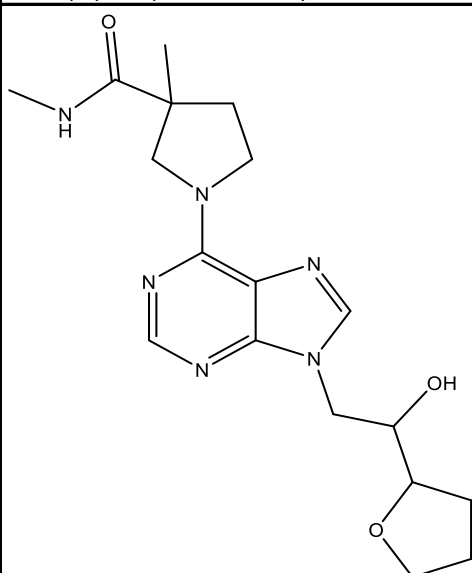

130 CNC(=O)C1(C)CCN(C1)C=2N=CN=C3N(CC(O)C4CCCO4)C=NC23

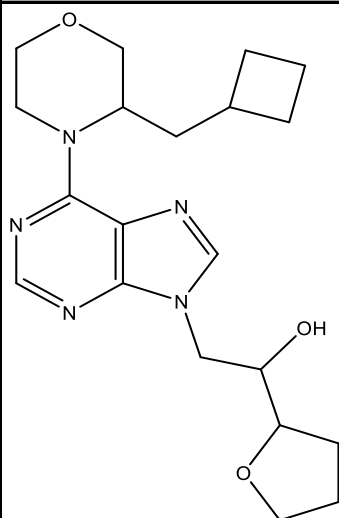

131 OC(CN1C=NC=2C(=NC=NC12)N3CCOCC3CC4CCCC4)C5CCCCO5

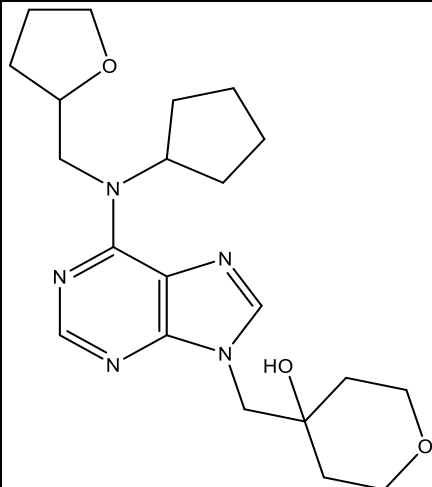

132 OC1(CN2C=NC=3C(=NC=NC23)N(CC4CCCO4)C5CCCC5)CCOCC1

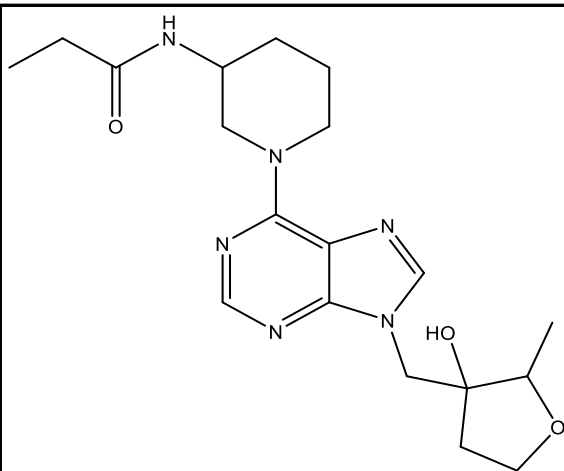

133 | CCC(=O)NC1CCCN(C1)C=2N=CN=C3N(CC4(O)CCOC4C)C=NC23

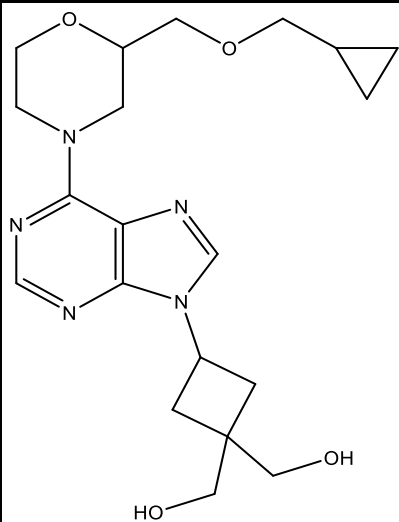

134 OCC1(CO)CC(C1)N2C=NC=3C(=NC=NC23)N4CCOC(COCC5CC5)C4

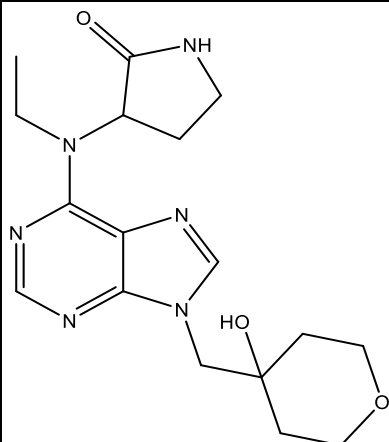

135 CCN(C1CCNC1=O)C=2N=CN=C3N(CC4(O)CCOCC4)C=NC23

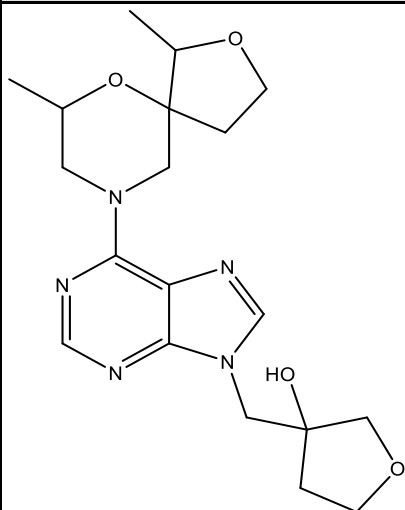

136 | CC1OCCC21CN(CC(C)O2)C=3N=CN=C4N(CC5(O)CCOC5)C=NC34

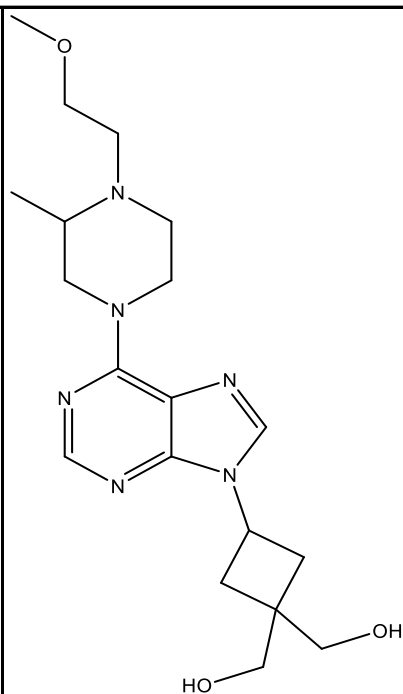

137 COCCN1CCN(CC1C)C=2N=CN=C3N(C=NC23)C4CC(CO)(CO)C4

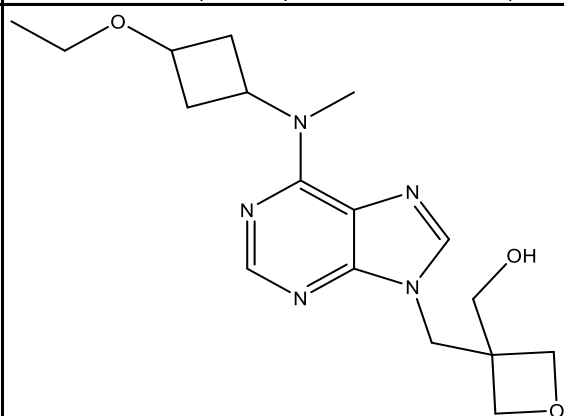

138 CCOC1CC(C1)N(C)C=2N=CN=C3N(CC4(CO)COC4)C=NC23

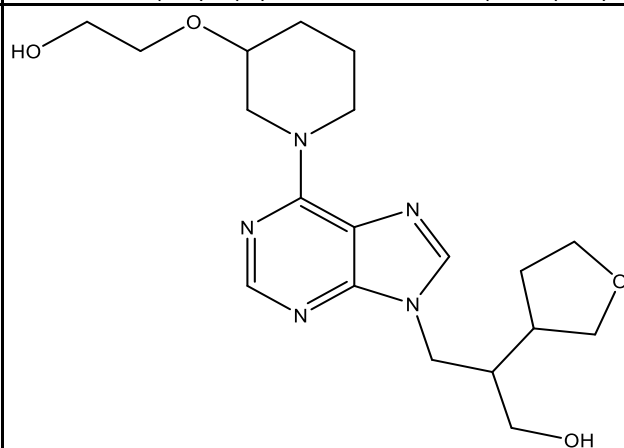

139 OCCOC1CCCN(C1)C=2N=CN=C3N(CC(CO)C4CCOC4)C=NC23

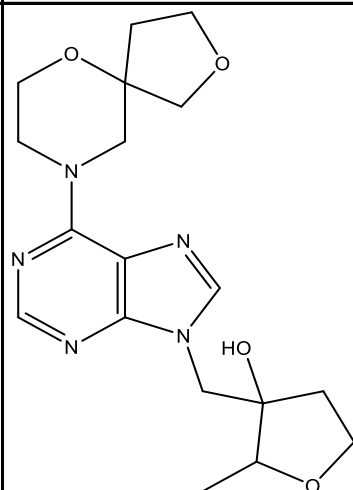

140 CC1OCCC1(O)CN2C=NC=3C(=NC=NC23)N4CCOC5(CCOC5)C4

|  |                                                                                                                                                                            |
|--|----------------------------------------------------------------------------------------------------------------------------------------------------------------------------|
|  | 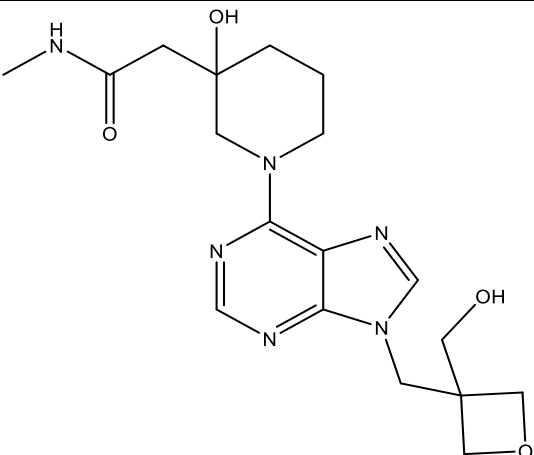 <p>141 <chem>CNC(=O)CC1(O)CCCN(C1)C=2N=CN=C3N(CC4(CO)COC4)C=NC23</chem></p>              |
|  |  <p>142 <chem>CC(=O)NCC1CN(CCO1)C=2N=CN=C3N(CC4(O)CCOCC4)C=NC23</chem></p>               |
|  |  <p>143 <chem>COC1CC(N(C)C=2N=CN=C3N(CC(O)C4CCCO4)C=NC23)C51CCC5</chem></p>             |
|  |  <p>144 <chem>OC(CN1C=NC=2C(=NC=NC12)N3C[C@@H]4CCS(=O)(=O)[C@@H]4C3)C5CCCCO5</chem></p> |

|  |                                                                                                                                                                           |
|--|---------------------------------------------------------------------------------------------------------------------------------------------------------------------------|
|  | 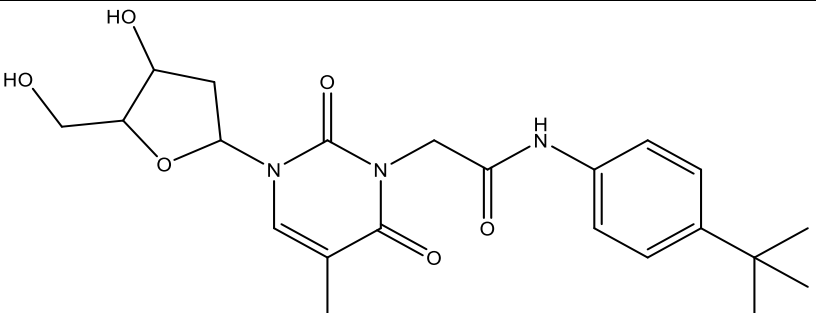 <p>145 <chem>CC1=CN(C2CC(O)C(CO)O2)C(=O)N(CC(=O)NC=3C=CC(=CC3)C(C)(C)C)C1=O</chem></p> |
|  |  <p>146 <chem>OCC1(CO)CC(C1)N2C=NC=3C(=NC=NC23)N4CC(O)(C4)C(F)F</chem></p>              |
|  |  <p>147 <chem>CC1CC2CCCCC2N1C=3N=CN=C4N(CC5(O)CCOC5)C=NC34</chem></p>                  |
|  |  <p>148 <chem>COC1CCC2OCCN(C2C1)C=3N=CN=C4N(CC5(CO)CCOCC5)C=NC34</chem></p>            |
|  |  <p>149 <chem>OCC(CN1C=NC=2C(=NC=NC12)N3CCCCC3C4CCCC4O)C5CCOC5</chem></p>              |

|     |                                                                                      |
|-----|--------------------------------------------------------------------------------------|
|     | 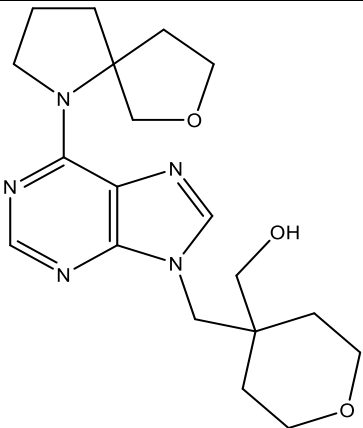    |
| 150 | <chem>OCC1(CN2C=NC=3C(=NC=NC23)N4CCCC54CCOC5)CCOCC1</chem>                           |
|     |    |
| 151 | <chem>O=C1NC(=O)N(CCCN2CCC=3C=CC=CC3C2)C=C1C#N</chem>                                |
|     |    |
| 152 | <chem>CCN1C=C(C#N)C(=O)N(CCC=2C=CN=CC2)C1=O</chem>                                   |
|     |   |
| 153 | <chem>CC1(C)NC(=O)N(CCCN2C(=O)C(C#N)=CN(C3CC3)C2=O)C1=O</chem>                       |
|     |  |
| 154 | <chem>CCNC(=O)CN1CCN(CC2=CC(=O)N(C)C(=O)N2C)CC1</chem>                               |
|     |   |
| 155 | <chem>CN1C=C(C=CC(=O)N2CCCCC2)C(=O)N(C)C1=O</chem>                                   |
|     |   |
| 156 | <chem>O=C1NC(=O)N(CC2CCN(C2)C=3C=CC=CC3)C=C1C#N</chem>                               |

|  |                                                                                                                                                                          |
|--|--------------------------------------------------------------------------------------------------------------------------------------------------------------------------|
|  | 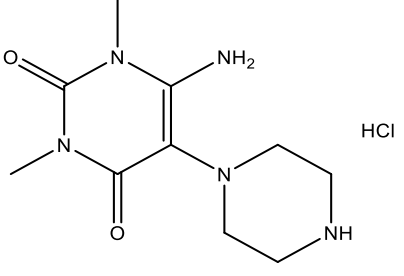 <p>157 <chem>Cl.CN1C(N)=C(N2CCNCC2)C(=O)N(C)C1=O</chem></p>                            |
|  |  <p>158 <chem>CC(=O)OCC1OC(C(OC(=O)C)C1OC(=O)C)N2C=C(F)C(=O)NC2=O</chem></p>           |
|  |  <p>159 <chem>CCC1(CCC1)C(=O)NC=2N=CN=C3N(CC4CCCO4)C(C)=C(C)C23</chem></p>            |
|  |  <p>160 <chem>COCC(C)N(C)C(=O)CN1C=CC(=O)N(C)C1=O</chem></p>                          |
|  |  <p>161 <chem>CO[C@H]1C[C@@H](CN(C)C=2N=CN=C3N(CC(CO)C4CCOC4)C=NC23)N(C)C1</chem></p> |

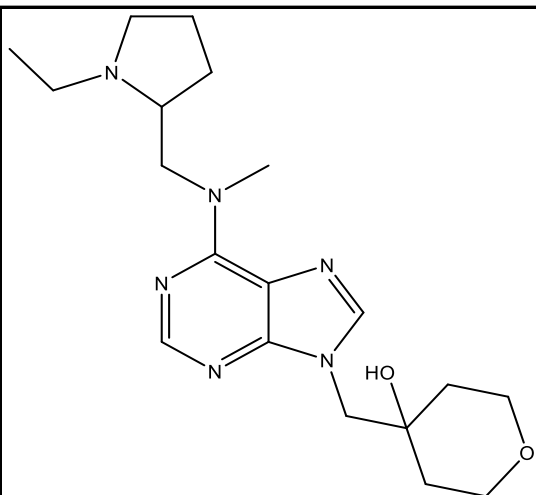

162 CCN1CCCC1CN(C)C=2N=CN=C3N(CC4(O)CCOCC4)C=NC23

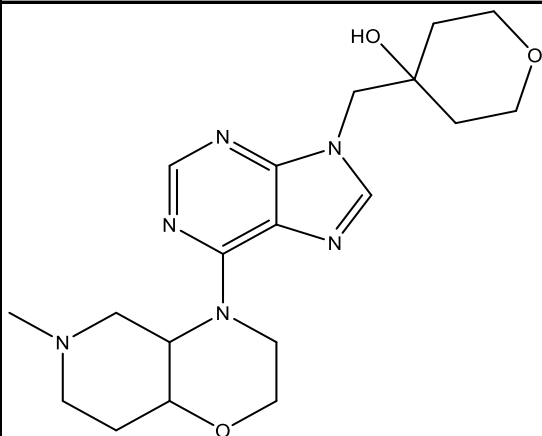

163 CN1CCC2OCCN(C2C1)C=3N=CN=C4N(CC5(O)CCOCC5)C=NC34

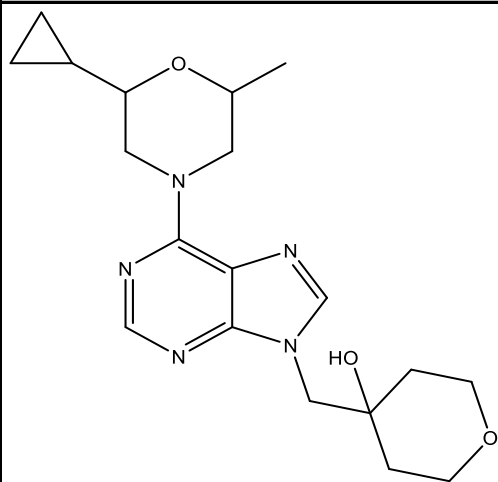

164 CC1CN(CC(O1)C2CC2)C=3N=CN=C4N(CC5(O)CCOCC5)C=NC34

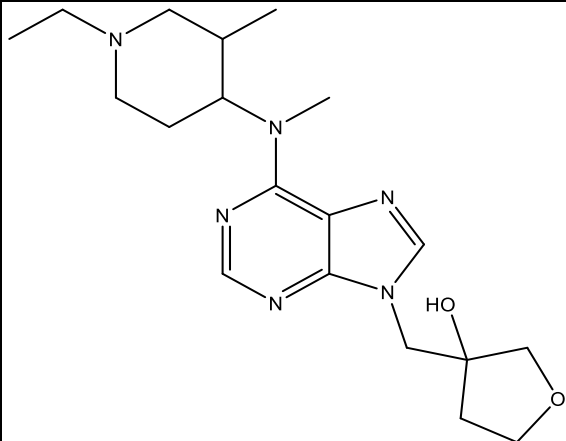

165 CCN1CCC(C(C)C1)N(C)C=2N=CN=C3N(CC4(O)CCOC4)C=NC23



|     |                                                                                     |
|-----|-------------------------------------------------------------------------------------|
|     | 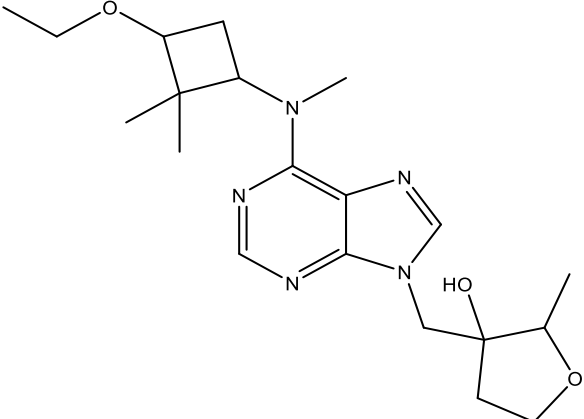   |
| 166 | <chem>CCOC1CC(N(C)C=2N=CN=C3N(CC4(O)CCOC4C)C=NC23)C1(C)C</chem>                     |
|     |   |
| 167 | <chem>CC(C)(C)N1C=C(CNC2=NC=3C=CC=CC3N2)C(=O)NC1=O</chem>                           |
|     |  |
| 168 | <chem>CCC1COC(C)(C)CN1C=2N=CN=C3N(C=NC23)C4CC(CO)(CO)C4</chem>                      |
|     |  |
| 169 | <chem>OCC1(CN2C=NC=3C(=NC=NC23)N4CCOCC4CC(F)F)COC1</chem>                           |
|     |  |
| 170 | <chem>COC[C@@H]1C[C@H](CN1C=2N=CN=C3N(CC4(O)CCOCC4)C=NC23)OC</chem>                 |

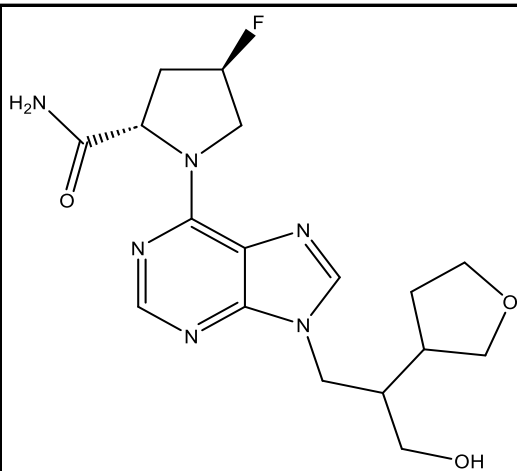

171 NC(=O)[C@@H]1C[C@@H](F)CN1C=2N=CN=C3N(CC(CO)C4CCOC4)C=NC23

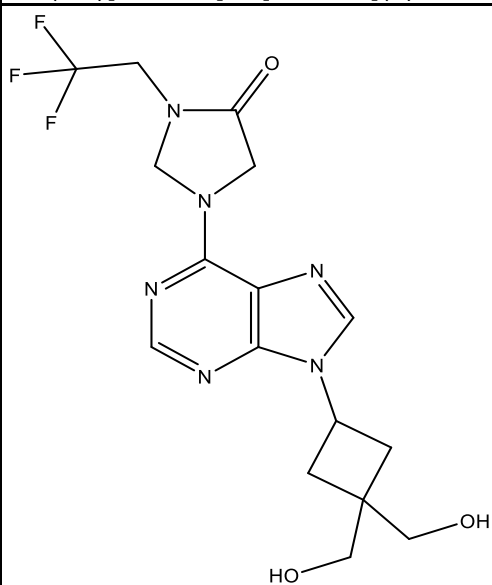

172 OCC1(CO)CC(C1)N2C=NC=3C(=NC=NC23)N4CN(CC(F)(F)F)C(=O)C4

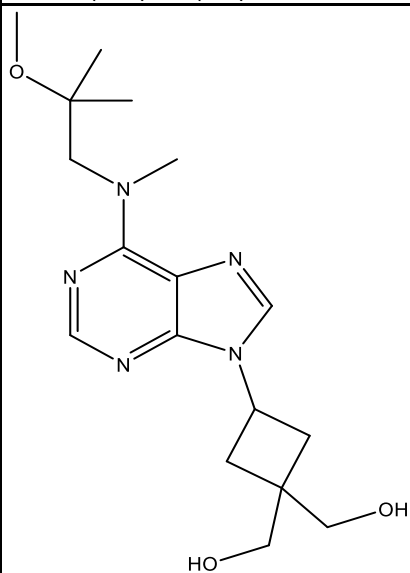

173 COC(C)(C)CN(C)C=1N=CN=C2N(C=NC12)C3CC(CO)(CO)C3

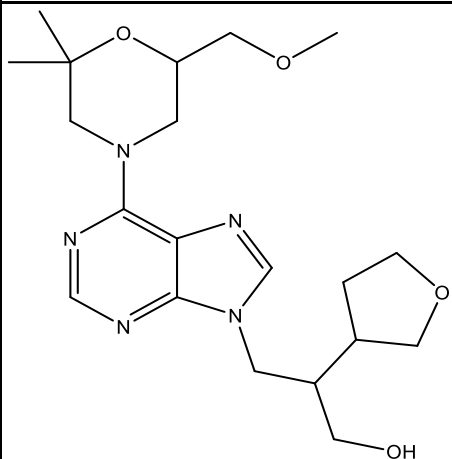

174 COCC1CN(CC(C)(C)O1)C=2N=CN=C3N(CC(CO)C4CCOC4)C=NC23

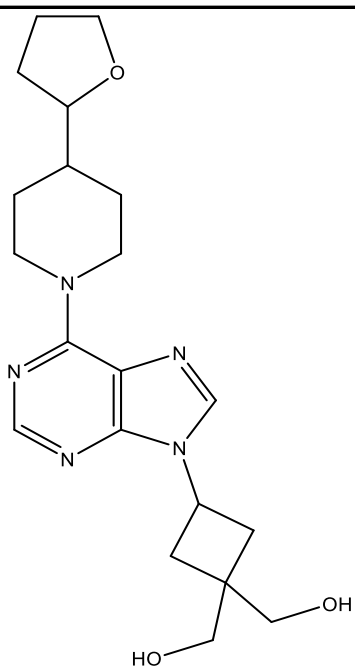OCC1(CO)CC(C1)N2C=NC=3C(=NC=NC23)N4CCC(CC4)C5CCCCO5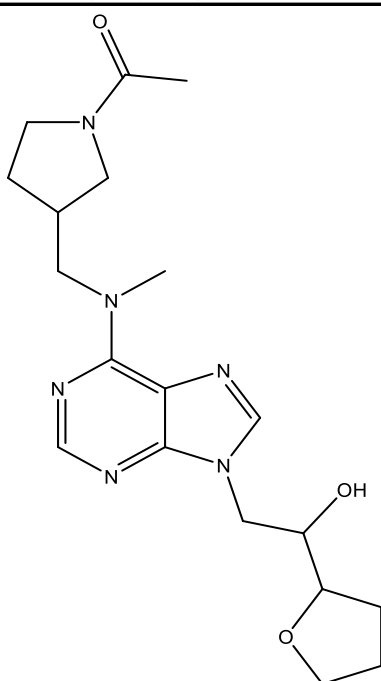

|     |                                                                  |
|-----|------------------------------------------------------------------|
| 176 | <chem>CN(CC1CCN(C1)C(=O)C)C=2N=CN=C3N(CC(O)C4CCCO4)C=NC23</chem> |
|-----|------------------------------------------------------------------|

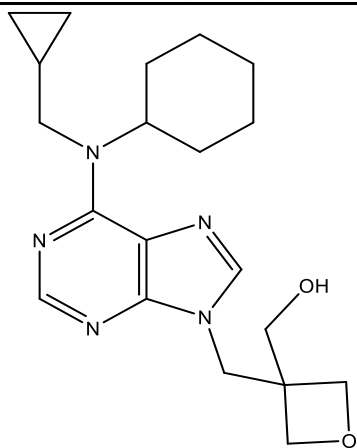

|     |                                                              |
|-----|--------------------------------------------------------------|
| 177 | <chem>OCC1(CN2C=NC=3C(=NC=NC23)N(CC4CC4)C5CCCCC5)COC1</chem> |
|-----|--------------------------------------------------------------|

|     |                                                                                     |
|-----|-------------------------------------------------------------------------------------|
|     | 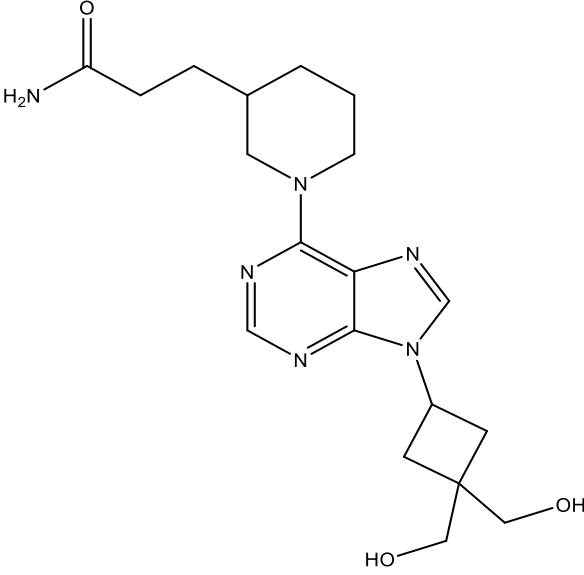   |
| 178 | <chem>NC(=O)CCC1CCCN(C1)C=2N=CN=C3N(C=NC23)C4CC(CO)(CO)C4</chem>                    |
|     |  |
| 179 | <chem>OCC(CN1C=NC=2C(=NC=NC12)N(CC(=O)NC3CC3)C4CC4)C5CCOC5</chem>                   |
|     |  |
| 180 | <chem>CCN(C(C)CS(=O)(=O)CC)C=1N=CN=C2N(CC3(O)CCOC3)C=NC12</chem>                    |
|     |  |
| 181 | <chem>OCC(CN1C=NC=2C(=NC=NC12)N3CCCC4(CNC(=O)C4)C3)C5CCOC5</chem>                   |
|     |  |
| 182 | <chem>CC1(CC2CC(C)(C)C1)CN2C=3N=CN=C4N(CC5(CO)COC5)C=NC34</chem>                    |

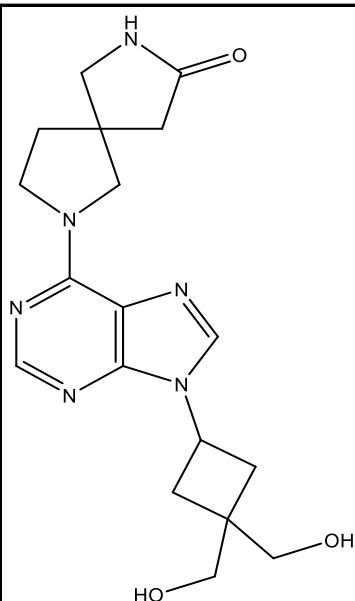

183 OCC1(CO)CC(C1)N2C=NC=3C(=NC=NC23)N4CCC5(CNC(=O)C5)C4

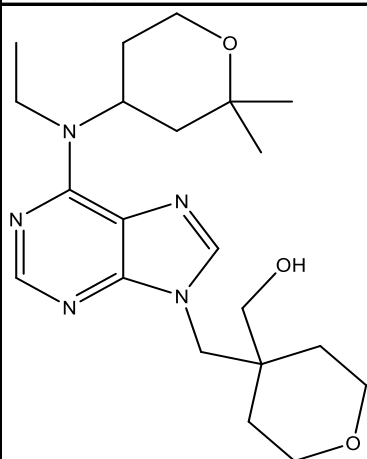

184 CCN(C1CCOC(C)(C)C1)C=2N=CN=C3N(CC4(CO)CCOCC4)C=NC23

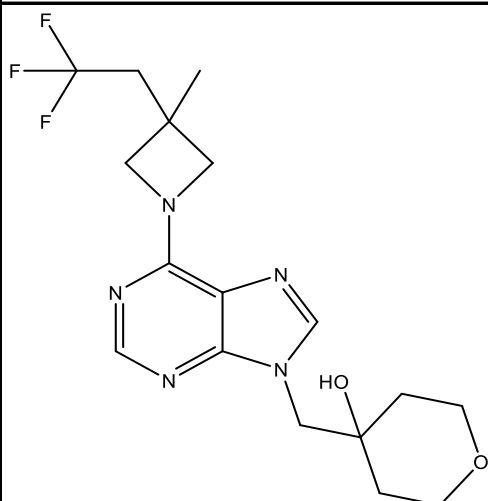

185 CC1(CC(F)(F)F)CN(C1)C=2N=CN=C3N(CC4(O)CCOCC4)C=NC23

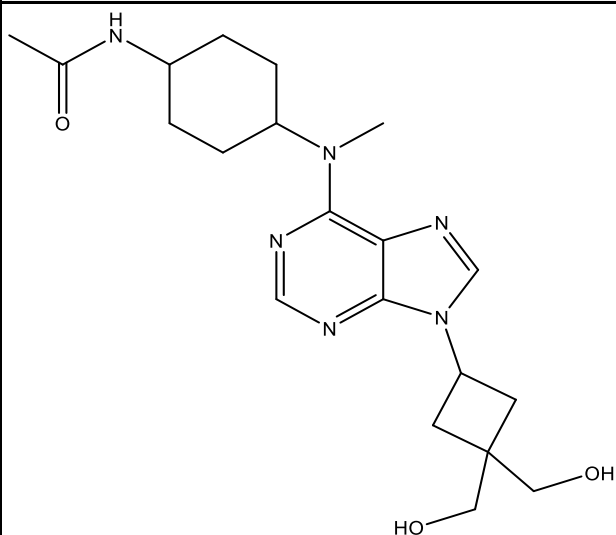

186 CN(C1CCC(CC1)NC(=O)C)C=2N=CN=C3N(C=NC23)C4CC(CO)(CO)C4

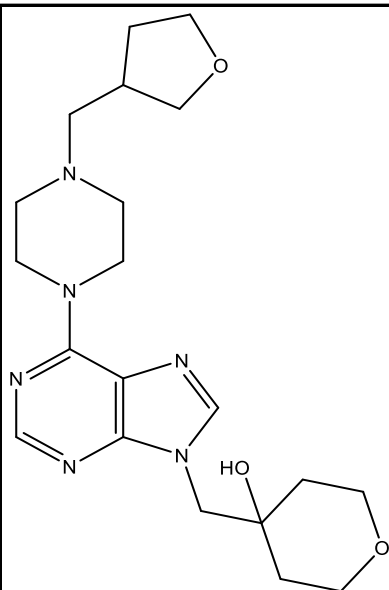

187 | OC1(CN2C=NC=3C(=NC=NC23)N4CCN(CC5CCOC5)CC4)CCOCC1

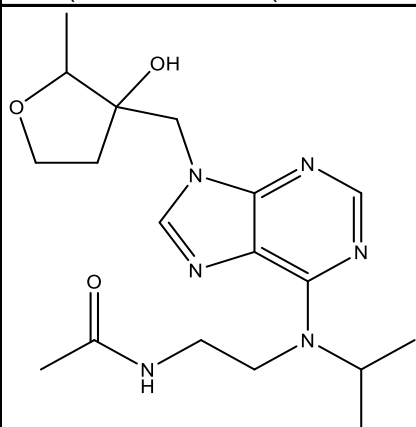

188 CC(C)N(CCNC(=O)C)C=1N=CN=C2N(CC3(O)CCOC3C)C=NC12

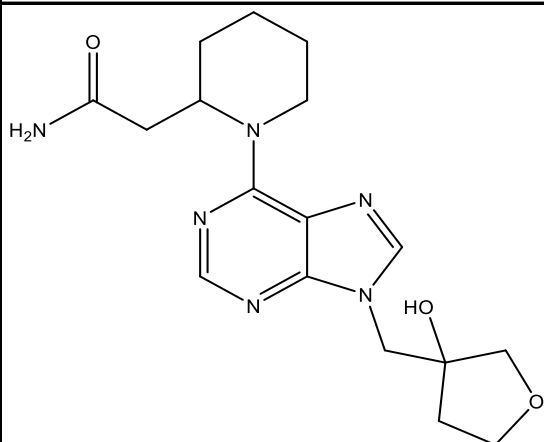

189 NC(=O)CC1CCCN1C=2N=CN=C3N(CC4(O)CCOC4)C=NC23

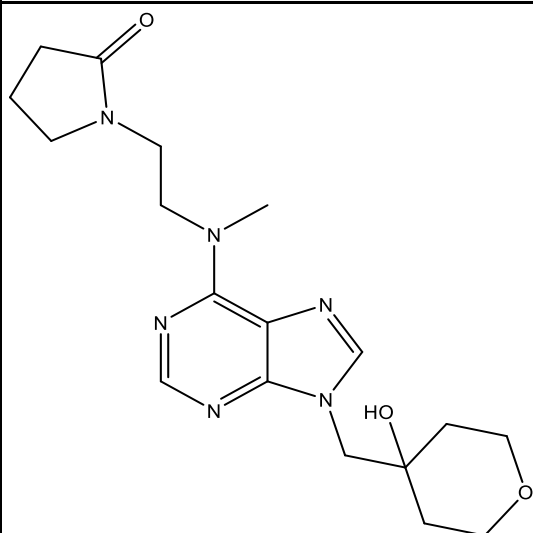

|     |                                                             |
|-----|-------------------------------------------------------------|
| 190 | <chem>CN(CCN1CCCC1=O)C=2N=CN=C3N(CC4(O)CCOCC4)C=NC23</chem> |
|-----|-------------------------------------------------------------|

|     |                                                                                     |
|-----|-------------------------------------------------------------------------------------|
|     | 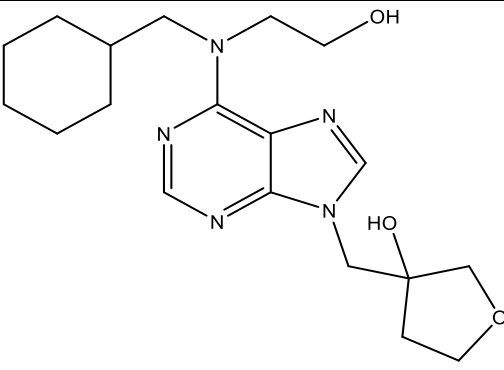   |
| 191 | <chem>OCCN(CC1CCCCC1)C=2N=CN=C3N(CC4(O)CCOC4)C=NC23</chem>                          |
|     |    |
| 192 | <chem>CN1C=NC=2C(=O)N(CC(O)C3CCC3)C=NC12</chem>                                     |
|     |   |
| 193 | <chem>CC(C)CN1CCN(C(C)C1=O)C=2N=CN=C3N(CC4(CO)CCOCC4)C=NC23</chem>                  |
|     |  |
| 194 | <chem>CC=1C=2CCCC2C=CC1CNCC3=CN(C(=O)NC3=O)C(C)(C)C</chem>                          |
|     |  |
| 195 | <chem>CCOCC1CCCCN1C=2N=CN=C3N(CC4(CO)COC4)C=NC23</chem>                             |

|  |                                                                                                                                                                    |
|--|--------------------------------------------------------------------------------------------------------------------------------------------------------------------|
|  | 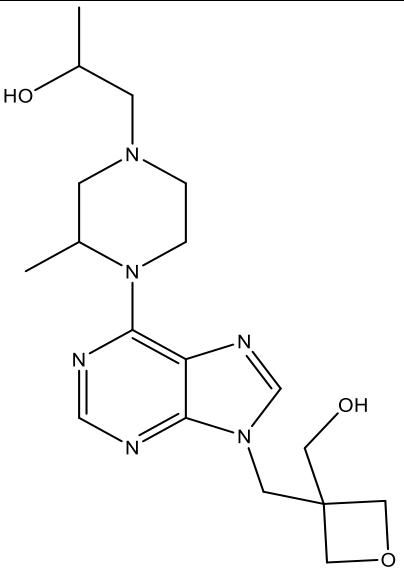 <p>196 <chem>CC(O)CN1CCN(C(C)C1)C=2N=CN=C3N(CC4(CO)COC4)C=NC23</chem></p>        |
|  |  <p>197 <chem>CC1CCN(C(=O)CN2C(=O)C(F)=CN(C3CCCCO3)C2=O)C=4C=CC=CC4S1</chem></p> |
|  |  <p>198 <chem>CC(C)(C)N1C=C(CNC=2C=CN=C3C=CN=CC23)C(=O)NC1=O</chem></p>         |
|  |  <p>199 <chem>CN1C=C(C(=O)N(CC(F)(F)F)C2CCC2)C(=O)NC1=O</chem></p>              |
|  |  <p>200 <chem>CCCN(C)C(=O)N1CC(C1)N2C=C(C#N)C(=O)NC2=O</chem></p>               |



|     |                                                                                           |
|-----|-------------------------------------------------------------------------------------------|
|     | 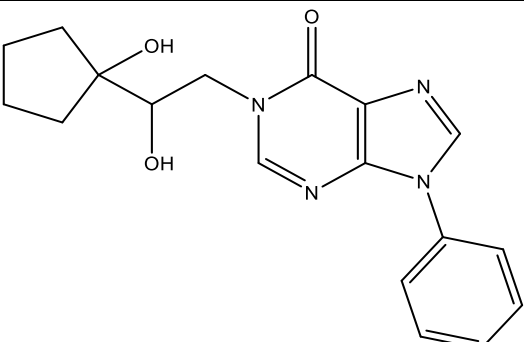         |
| 201 | <chem>OC(CN1C=NC=2N(C=NC2C1=O)C=3C=CC=CC3)C4(O)CCCC4</chem>                               |
|     |          |
| 202 | <chem>CC(C)N1C=C(CNC(=O)N2CCC=C(C)C2)C(=O)NC1=O</chem>                                    |
|     |         |
| 203 | <chem>CC1(C)CCN(CC1)C(=O)CCN2C=C(C#N)C(=O)NC2=O</chem>                                    |
|     |        |
| 204 | <chem>CN(C1CCCC1)C(=O)CN2C=CC(=O)NC2=O</chem>                                             |
|     |        |
| 205 | <chem>CCC1CN2CCCCC2CN1C=3N=CN=C4N(CC5(CO)CCOCC5)C=NC34</chem>                             |
|     |        |
| 206 | <chem>CC1=CC(=C(C)O1)C(C)(O)CNC=2N=CN=C3N(C=NC23)[C@@H]4O[C@H](CO)[C@@H](O)[C@H]4O</chem> |

|  |                                                                                                                                                                    |
|--|--------------------------------------------------------------------------------------------------------------------------------------------------------------------|
|  | 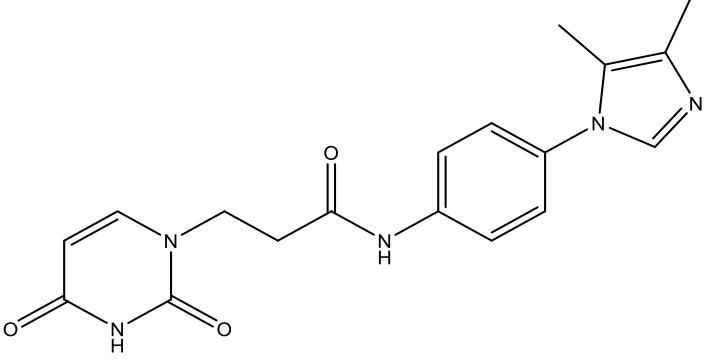 <p>207 <chem>CC=1N=CN(C1C)C=2C=CC(NC(=O)CCN3C=CC(=O)NC3=O)=CC2</chem></p>       |
|  |  <p>208 <chem>OCC1(CN2C=NC=3C(=NC=NC23)N4CC5CC5(C4)C(F)(F)F)CCOCC1</chem></p>    |
|  |  <p>209 <chem>OC1(CN2C=NC=3C(=NC=NC23)N4CCC5(O)CCCCC5C4)CCOCC1</chem></p>       |
|  |  <p>210 <chem>OCC1(CO)CC(C1)N2C=NC=3C(=NC=NC23)N4CCC5(O)CCCCC5C4</chem></p>    |
|  |  <p>211 <chem>CC(NC(=O)C)C1CCN(CC1)C=2N=CN=C3N(C=NC23)C4CC(CO)(CO)C4</chem></p> |

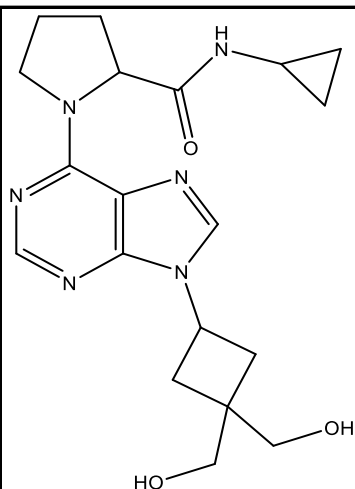

212 OCC1(CO)CC(C1)N2C=NC=3C(=NC=NC23)N4CCCC4C(=O)NC5CC5

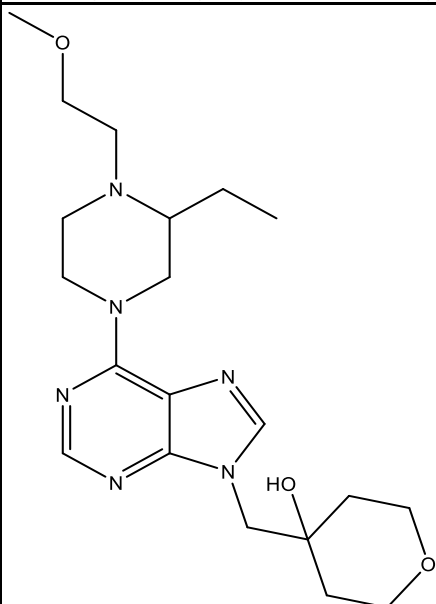

213 CCC1CN(CCN1CCOC)C=2N=CN=C3N(CC4(O)CCOCC4)C=NC23

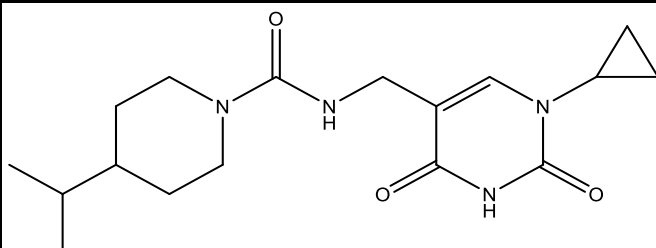

214 CC(C)C1CCN(CC1)C(=O)NCC2=CN(C3CC3)C(=O)NC2=O

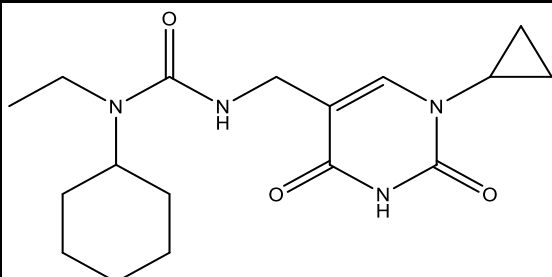

215 CCN(C1CCCCC1)C(=O)NCC2=CN(C3CC3)C(=O)NC2=O

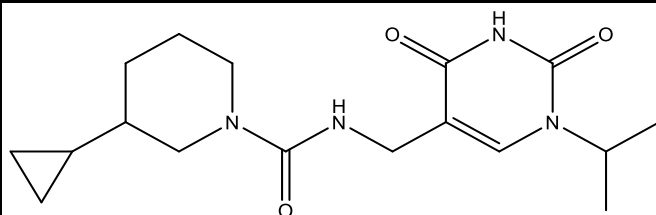

216 CC(C)N1C=C(CNC(=O)N2CCCC(C2)C3CC3)C(=O)NC1=O

|     |                                                                                     |
|-----|-------------------------------------------------------------------------------------|
|     | 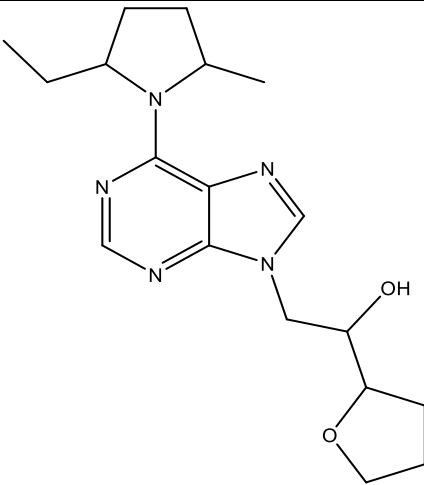   |
| 217 | <chem>CCC1CCC(C)N1C=2N=CN=C3N(CC(O)C4CCCO4)C=NC23</chem>                            |
|     |  |
| 218 | <chem>O=C(CN1C=CC(=O)NC1=O)N2CCCCC2</chem>                                          |
|     |  |
| 219 | <chem>CC1CN(CC(C)(C)O)CCN1C=2N=CN=C3N(CC(CO)C4CCOC4)C=NC23</chem>                   |
|     |  |
| 220 | <chem>CC(C)CC(CO)N(C)C=1N=CN=C2N(CC3(O)CCOCC3)C=NC12</chem>                         |

|     |                                                                                      |
|-----|--------------------------------------------------------------------------------------|
|     | 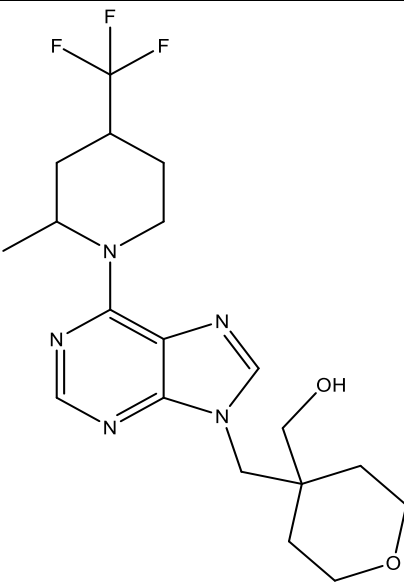    |
| 221 | <chem>CC1CC(CCN1C=2N=CN=C3N(CC4(CO)CCOCC4)C=NC23)C(F)(F)F</chem>                     |
|     |    |
| 222 | <chem>CC(C)CN(C1CCN(C)CC1)C=2N=CN=C3N(CC4(O)CCOC4C)C=NC23</chem>                     |
|     |   |
| 223 | <chem>CC=1C=CC(=NN1)N2CCCC2CO</chem>                                                 |
|     |  |
| 224 | <chem>CC=1C=CC(C)=C(OCC(O)CN2C(=O)C(F)=CN(C3CCCO3)C2=O)C1C</chem>                    |
|     |   |
| 225 | <chem>OC(=O)CN(C1CC1)C(=O)CN2C=CC(=O)NC2=O</chem>                                    |
|     |   |
| 226 | <chem>COC(=O)C1(CN2C=CC(=O)N(C)C2=O)CC1</chem>                                       |

|                                                                                      |                                                                                    |
|--------------------------------------------------------------------------------------|------------------------------------------------------------------------------------|
| 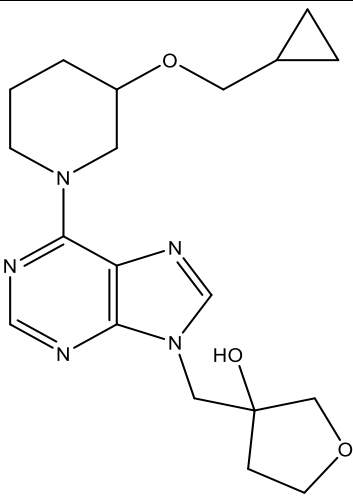    | <p>227 <chem>OC1(CN2C=NC=3C(=NC=NC23)N4CCCC(C4)OCC5CC5)CCOC1</chem></p>            |
|     | <p>228 <chem>CC(C)N1C=C(CNC(=O)N2CCCC2(C)C)C(=O)NC1=O</chem></p>                   |
|   | <p>229 <chem>NC(=O)C1C2CCCC2CN1C=3N=CN=C4N(CC5(CO)COC5)C=NC34</chem></p>           |
|  | <p>230 <chem>CC1OCCC1(O)CN2C=NC=3C(=NC=NC23)N4CC[C@@H]5OCC(=O)N[C@H]5C4</chem></p> |
|   | <p>231 <chem>NC(=O)CN1CCN(CC1=O)C=2N=CN=C3N(CC(O)C4CCCO4)C=NC23</chem></p>         |

|     |                                                                                      |
|-----|--------------------------------------------------------------------------------------|
|     | 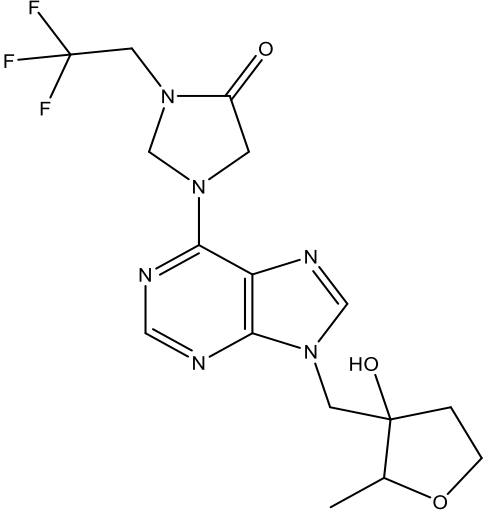    |
| 232 | <chem>CC1OCCC1(O)CN2C=NC=3C(=NC=NC23)N4CN(CC(F)(F)F)C(=O)C4</chem>                   |
|     |   |
| 233 | <chem>CC1CCCN1C(=O)NCC2=CN(C(=O)NC2=O)C(C)(C)C</chem>                                |
|     |   |
| 234 | <chem>CN(CC(=O)NC1CC1)C=2N=CN=C3N(CC4(CO)COC4)C=NC23</chem>                          |
|     |  |
| 235 | <chem>FC1=CN(C2CCCO2)C(=O)N(CC(=O)N3CCN(CC3)C(=O)C4=CC=CO4)C1=O</chem>               |
|     |   |
| 236 | <chem>OC(CN1C(=O)C(F)=CN(C2CCCO2)C1=O)C3CCCCC3</chem>                                |

|  |                                                                                                                                                                      |
|--|----------------------------------------------------------------------------------------------------------------------------------------------------------------------|
|  | 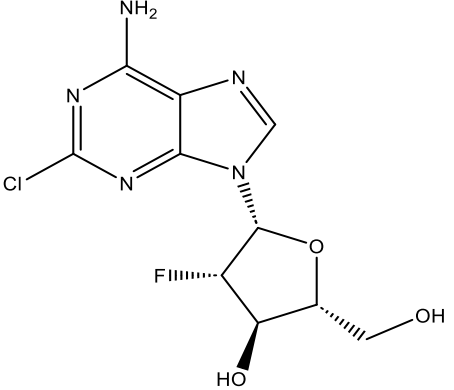 <p>237 <chem>NC=1N=C(Cl)N=C2N(C=NC12)[C@@H]3O[C@H](CO)[C@@H](O)[C@@H]3F</chem></p> |
|  |  <p>238 <chem>NC=1C=CN([C@H]2CC[C@H](CO)O2)C(=O)N1</chem></p>                       |
|  |  <p>239 <chem>NC(=O)C=1N=CN(N1)[C@@H]2O[C@H](CO)[C@@H](O)[C@H]2O</chem></p>        |
|  |  <p>240 <chem>OC[C@H]1O[C@H](C[C@@H]1O)N2C=NC=3[C@H](O)CNC=NC32</chem></p>        |
|  |  <p>241 <chem>CCNC(=O)C1CCN(CC1)C=2N=CN=C3N(CC(CO)C4CCOC4)C=NC23</chem></p>       |



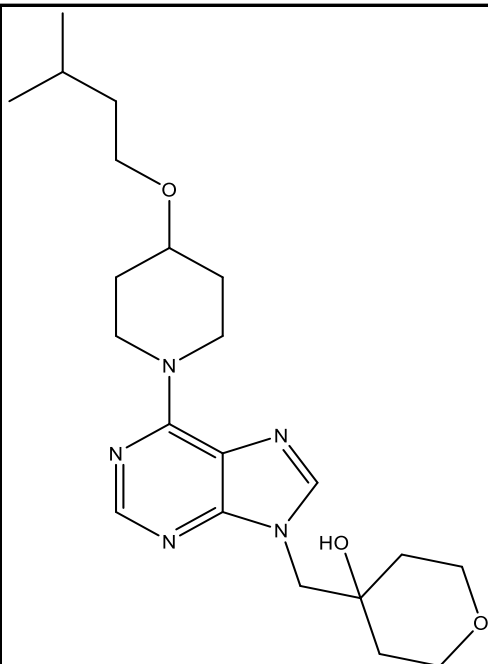

242 CC(C)CCOC1CCN(CC1)C=2N=CN=C3N(CC4(O)CCOCC4)C=NC23

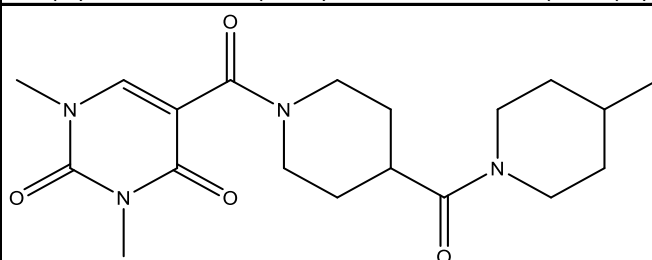

243 CC1CCN(CC1)C(=O)C2CCN(CC2)C(=O)C3=CN(C)C(=O)N(C)C3=O

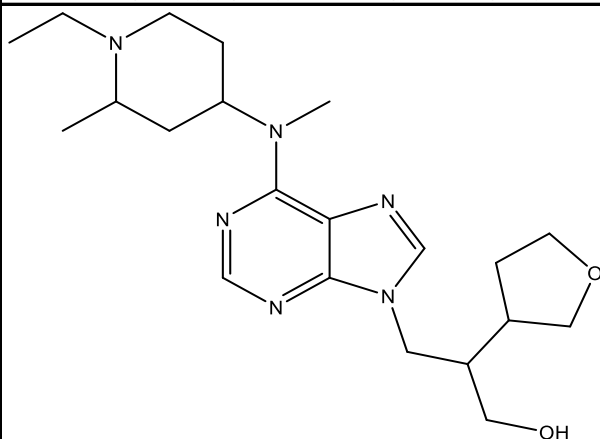

244 CCN1CCC(CC1C)N(C)C=2N=CN=C3N(CC(CO)C4CCOC4)C=NC23

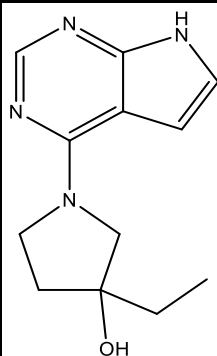

245 CCC1(O)CCN(C1)C=2N=CN=C3NC=CC23

|     |                                                                                     |
|-----|-------------------------------------------------------------------------------------|
|     | 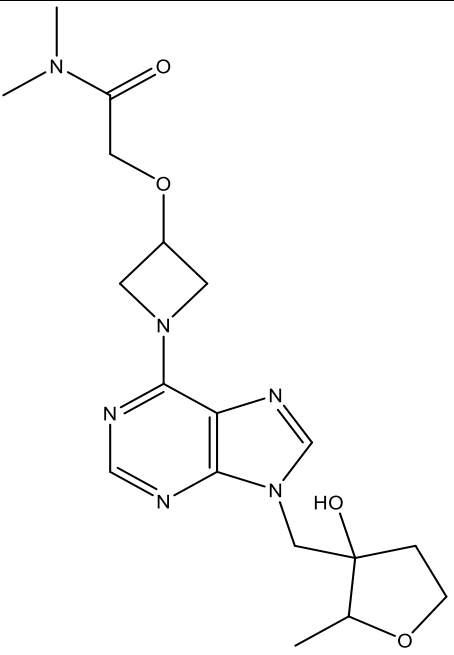   |
| 246 | <chem>CC1OCCC1(O)CN2C=NC=3C(=NC=NC23)N4CC(C4)OCC(=O)N(C)C</chem>                    |
|     |  |
| 247 | <chem>FC1=CN(C2CCCO2)C(=O)N(CC(=O)NC=3C=CC=C(I)C3)C1=O</chem>                       |
|     |  |
| 248 | <chem>CN1CCN(C)CC(C1)NC(=O)C2=CN(C)C(=O)NC2=O</chem>                                |
|     |  |
| 249 | <chem>CC(C)CC1N(CCNC1=O)C=2N=CN=C3N(C=NC23)C4CC(CO)(CO)C4</chem>                    |

|  |                                                                                                                                                                        |
|--|------------------------------------------------------------------------------------------------------------------------------------------------------------------------|
|  | 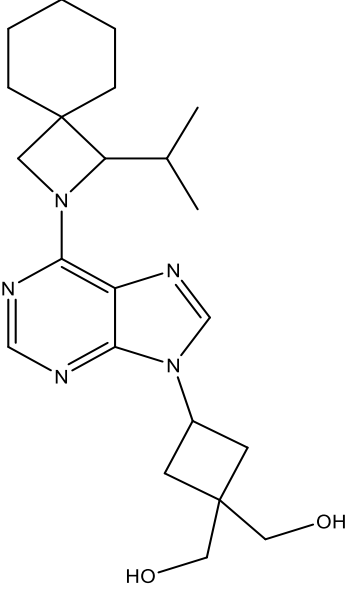 <p>250 <chem>CC(C)C1N(CC21CCCCC2)C=3N=CN=C4N(C=NC34)C5CC(CO)(CO)C5</chem></p>        |
|  |  <p>251 <chem>OCC1(CO)CC(C1)N2C=NC=3C(=NC=NC23)N4CC(=O)NC5CCCCC54</chem></p>         |
|  |  <p>252 <chem>CN1[C@H]2CCN(C[C@H]2NC1=O)C=3N=CN=C4N(CC5(CO)CCOCC5)C=NC34</chem></p> |
|  |  <p>253 <chem>CC(C)(C)N1C=C(CNCC2(O)CCC2)C(=O)NC1=O</chem></p>                      |

|     |                                                                                     |
|-----|-------------------------------------------------------------------------------------|
|     | 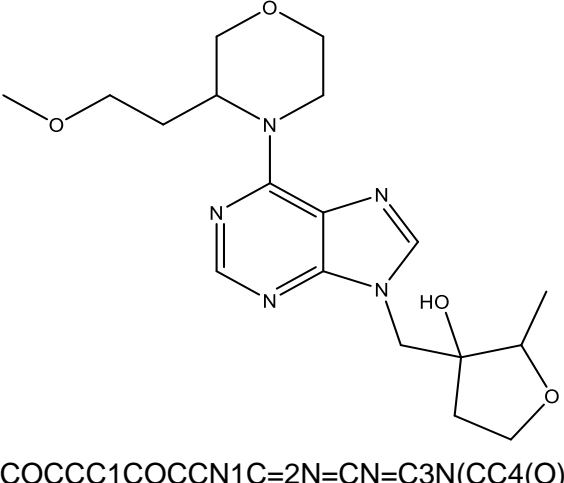   |
| 254 | <chem>COC1CCN(C1)C2=NC=CN=C3N(CC4(O)CCOC4C)C=NC23</chem>                            |
|     |   |
| 255 | <chem>CCNC(=O)CN1CCN(CC1)C2=NC=CN=C3N(CC4(CO)CCOCC4)C=NC23</chem>                   |
|     |  |
| 256 | <chem>COC1CCN(CC1=O)C2=NC=CN=C3N(CC4(CO)COC4)C=NC23</chem>                          |
|     |  |
| 257 | <chem>CC(=O)NCC1CCCN(C1)C2=NC=CN=C3N(CC4(CO)COC4)C=NC23</chem>                      |

|     |                                                                                     |
|-----|-------------------------------------------------------------------------------------|
|     | 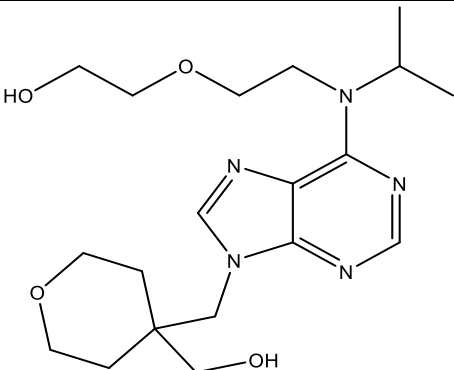   |
| 258 | <chem>CC(C)N(CCOCCO)C=1N=CN=C2N(CC3(CO)CCOCC3)C=NC12</chem>                         |
|     |    |
| 259 | <chem>COCCN(CC(=O)N(C)C)C=1N=CN=C2N(CC3(CO)CCOCC3)C=NC12</chem>                     |
|     |  |
| 260 | <chem>OCC1(CN2C=NC=3C(=NC=NC23)N4CCC5(CC4)NC(=O)NC5=O)COC1</chem>                   |
|     |  |
| 261 | <chem>CCN1CCC2CCC(C1)N2C=3N=CN=C4N(CC5(CO)COC5)C=NC34</chem>                        |
|     |  |
| 262 | <chem>CC1OCCC1(O)CN2C=NC=3C(=NC=NC23)N(C)CC4CCS(=O)(=O)C4</chem>                    |

|  |                                                                                                                                                               |
|--|---------------------------------------------------------------------------------------------------------------------------------------------------------------|
|  | 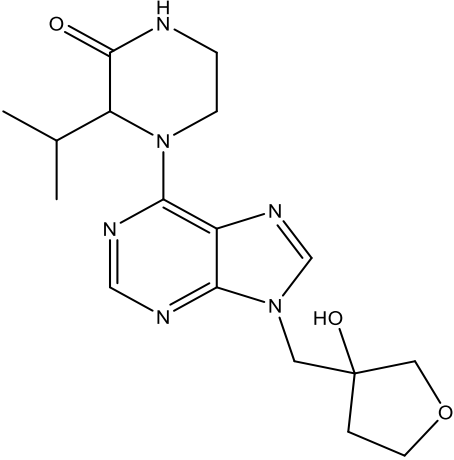 <p>263 <chem>CC(C)C1N(CCNC1=O)C=2N=CN=C3N(CC4(O)CCOC4)C=NC23</chem></p>     |
|  |  <p>264 <chem>OC(CN1C=NC=2C(=NC=NC12)N3CCCC3C(=O)NC4CC4)C5CCCO5</chem></p>  |
|  |  <p>265 <chem>OC1CCCC1C2COCCN2C=3N=CN=C4N(CC5(O)CCOC5)C=NC34</chem></p>    |
|  |  <p>266 <chem>OC1(CN2C=NC=3C(=NC=NC23)N4CC(=O)NC5CCCCC54)CCOCC1</chem></p> |

|     |                                                                                     |
|-----|-------------------------------------------------------------------------------------|
|     | 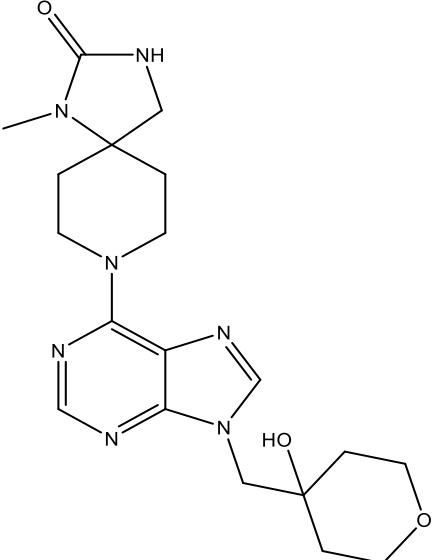   |
| 267 | <chem>CN1C(=O)NCC21CCN(CC2)C=3N=CN=C4N(CC5(O)CCOCC5)C=NC34</chem>                   |
|     |  |
| 268 | <chem>OCC1(CN2C=NC=3C(=NC=NC23)N(CCC#N)CC4CCOC4)CCOCC1</chem>                       |
|     |  |
| 269 | <chem>OC[C@@H]1C[C@H](F)CN1C=2N=CN=C3N(CC4(O)CCOC4)C=NC23</chem>                    |
|     |  |
| 270 | <chem>OC1(CN2C=NC=3C(=NC=NC23)N4C5CCCC4CC(F)(F)C5)CCOCC1</chem>                     |

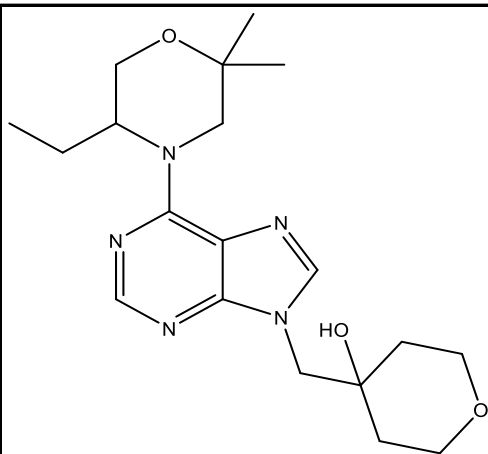

271 CCC1COC(C)(C)CN1C=2N=CN=C3N(CC4(O)CCOCC4)C=NC23

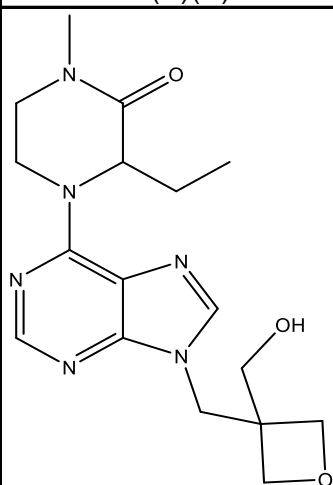

272 CCC1N(CCN(C)C1=O)C=2N=CN=C3N(CC4(CO)COC4)C=NC23

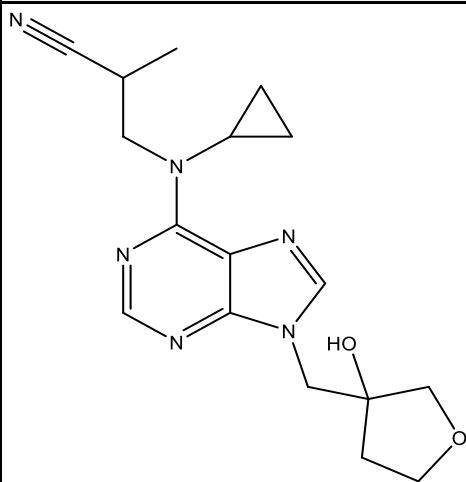

273 CC(CN(C1CC1)C=2N=CN=C3N(CC4(O)CCOC4)C=NC23)C#N

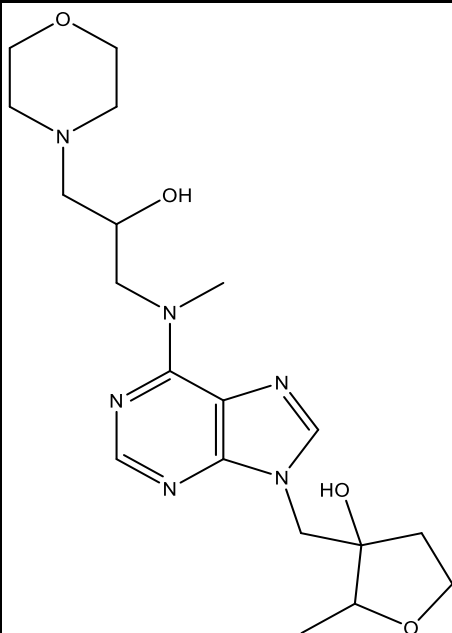

274 CC1OCCC1(O)CN2C=NC=3C(=NC=NC23)N(C)CC(O)CN4CCOCC4



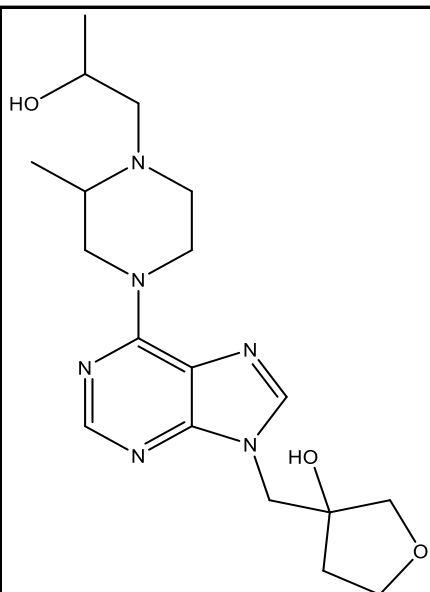

275 CC(O)CN1CCN(CC1C)C=2N=CN=C3N(CC4(O)CCOC4)C=NC23

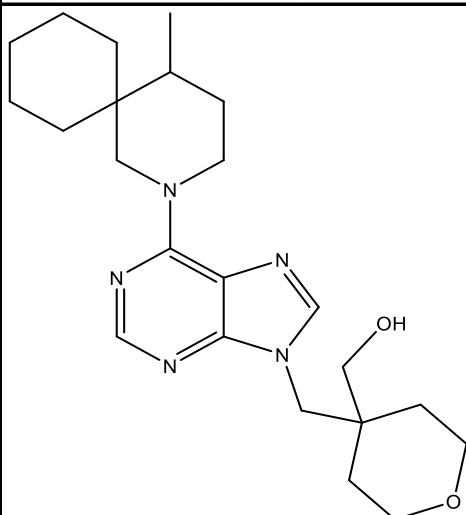

276 CC1CCN(CC21CCCCC2)C=3N=CN=C4N(CC5(CO)CCOCC5)C=NC34

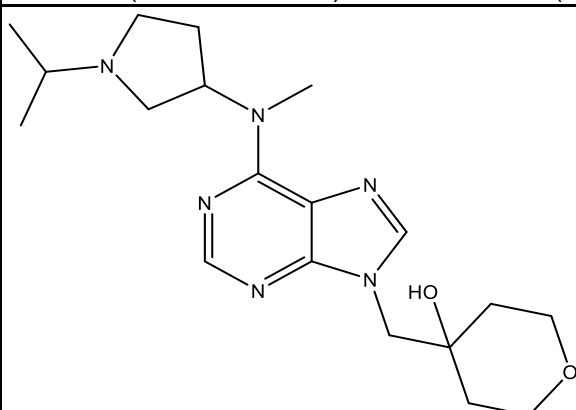

277 CC(C)N1CCC(C1)N(C)C=2N=CN=C3N(CC4(O)CCOCC4)C=NC23

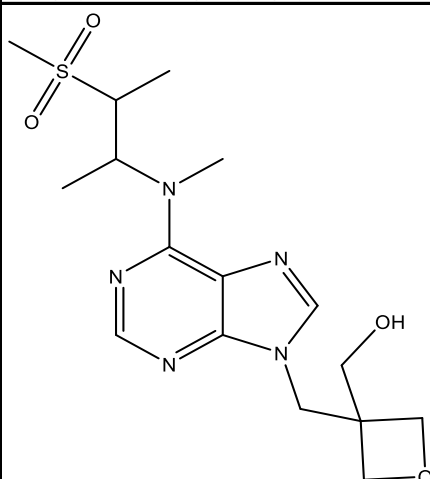

278 CC(C(C)S(=O)(=O)C)N(C)C=1N=CN=C2N(CC3(CO)COC3)C=NC12

|  |                                                                                                                                                                 |
|--|-----------------------------------------------------------------------------------------------------------------------------------------------------------------|
|  | 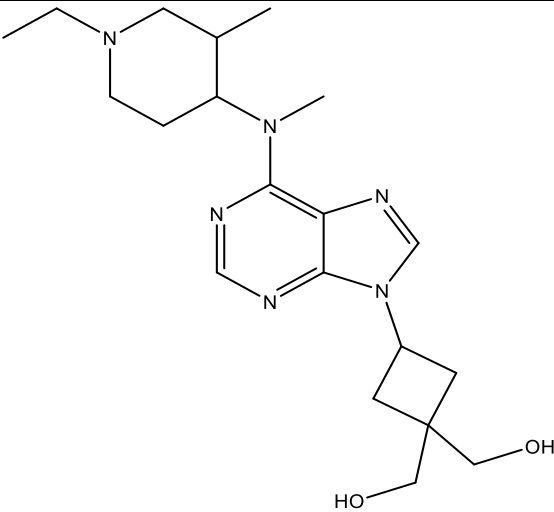 <p>279 <chem>CCN1CCC(C(C)C1)N(C)C=2N=CN=C3N(C=NC23)C4CC(CO)(CO)C4</chem></p>  |
|  |  <p>280 <chem>COCCN(C1CCC(C)C1)C=2N=CN=C3N(CC4(CO)COC4)C=NC23</chem></p>      |
|  |  <p>281 <chem>CC(C)C(=O)NCCN(C)C=1N=CN=C2N(C=NC12)C3CC(CO)(CO)C3</chem></p> |
|  |  <p>282 <chem>CC1OCCC1(O)CN2C=NC=3C(=NC=NC23)N4CCOC(COCC5CC5)C4</chem></p>   |
|  |  <p>283 <chem>CN(CC(C)(CO)CO)C=1N=CN=C2N(CC3(O)CCOC3)C=NC12</chem></p>       |

|  |                                                                                                                                                                        |
|--|------------------------------------------------------------------------------------------------------------------------------------------------------------------------|
|  | 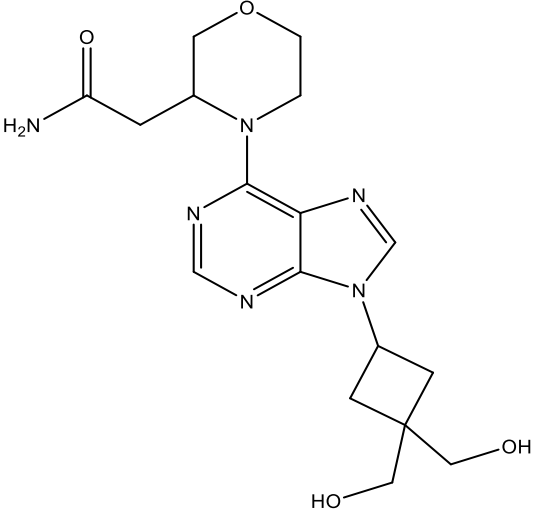 <p>284 <chem>NC(=O)CC1COCCN1C=2N=CN=C3N(C=NC23)C4CC(CO)(CO)C4</chem></p>             |
|  |  <p>285 <chem>CC1(C)CN(CC2(CCOC2)O1)C=3N=CN=C4N(CC5(CO)COC5)C=NC34</chem></p>        |
|  |  <p>286 <chem>OCC1CC2CCC1N2C=3N=CN=C4N(C=NC34)C5CC(CO)(CO)C5</chem></p>             |
|  |  <p>287 <chem>CO[C@H]1C[C@H](N(C1)C=2N=CN=C3N(CC(O)C4CCCO4)C=NC23)C(=O)N</chem></p> |
|  |  <p>288 <chem>CCN(CC(C)C#N)C=1N=CN=C2N(CC3(CO)COC3)C=NC12</chem></p>                |

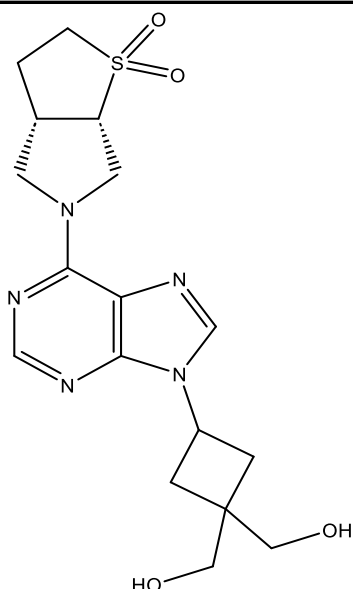

289 OCC1(CO)CC(C1)N2C=NC=3C(=NC=NC23)N4C[C@@H]5CCS(=O)(=O)[C@@H]5C4

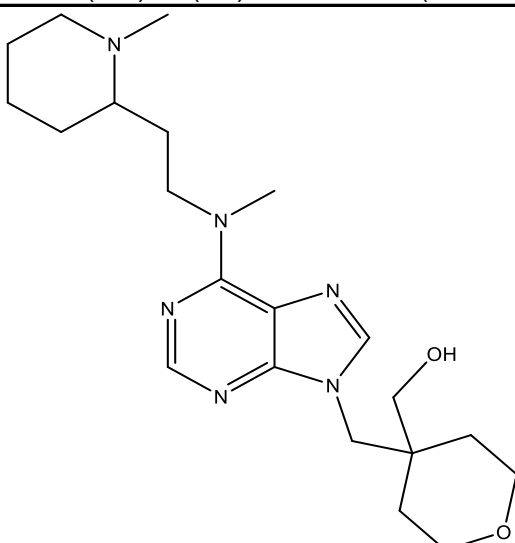

290 CN(CCC1CCCCN1C)C=2N=CN=C3N(CC4(CO)CCOCC4)C=NC23

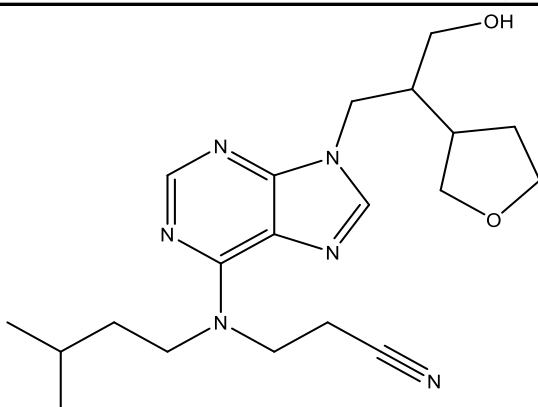

291 CC(C)CCN(CCC#N)C=1N=CN=C2N(CC(CO)C3CCOC3)C=NC12

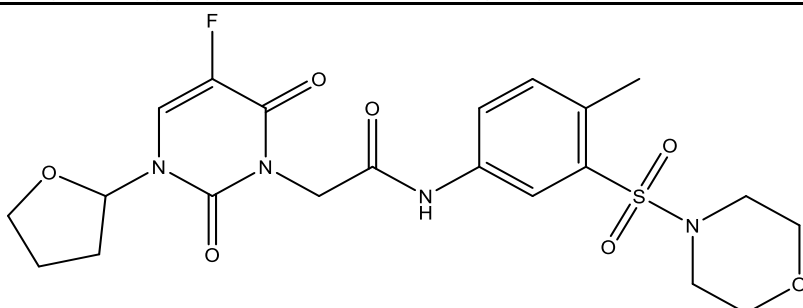

292 CC=1C=CC(NC(=O)CN2C(=O)C(F)=CN(C3CCCO3)C2=O)=CC1S(=O)(=O)N4CCOCC4

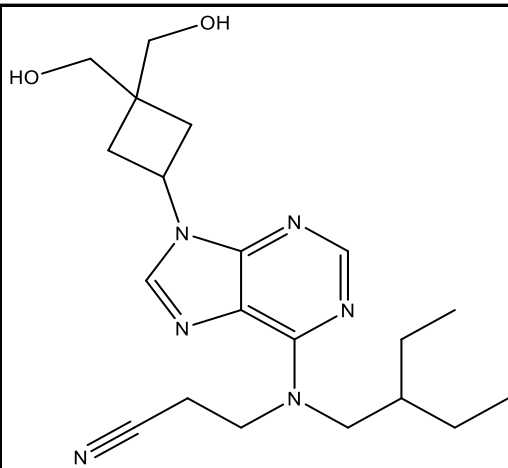

293 CCC(CC)CN(CCC#N)C=1N=CN=C2N(C=NC12)C3CC(CO)(CO)C3

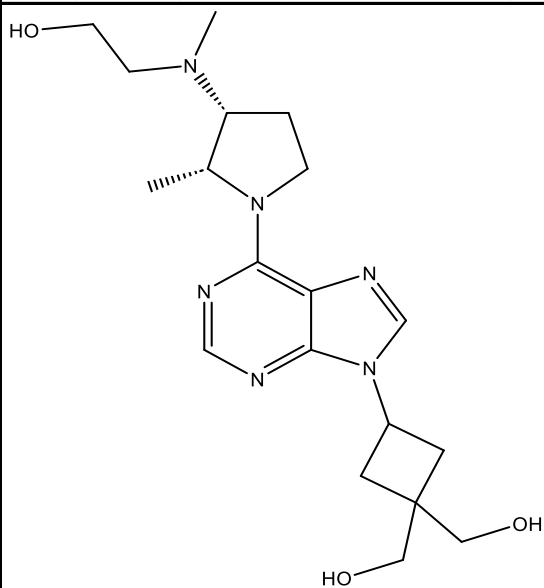

294 C[C@@H]1[C@@H](CCN1C=2N=CN=C3N(C=NC23)C4CC(CO)(CO)C4)N(C)CCO

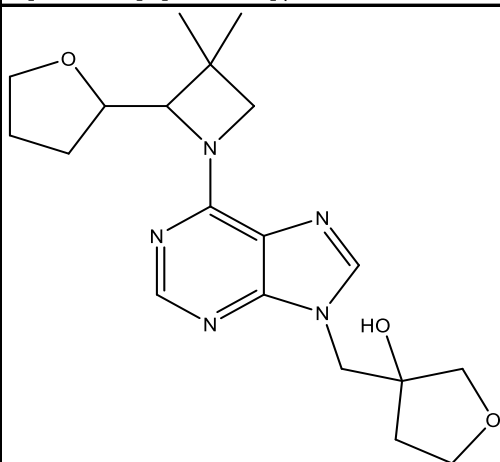

295 CC1(C)CN(C1C2CCCO2)C=3N=CN=C4N(CC5(O)CCOC5)C=NC34

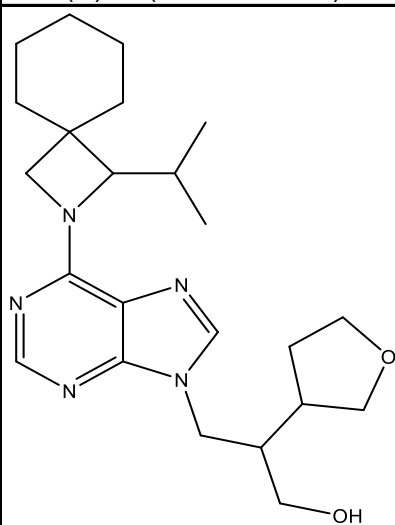

296 CC(C)C1N(CC21CCCCC2)C=3N=CN=C4N(CC(CO)C5CCOC5)C=NC34

|     |                                                                                     |
|-----|-------------------------------------------------------------------------------------|
|     | 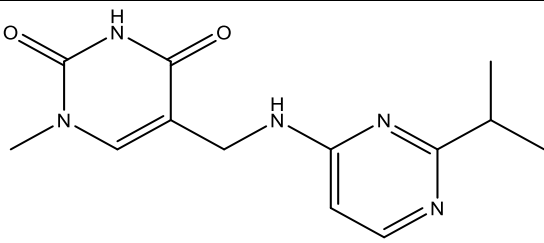   |
| 297 | <chem>CC(C)C=1N=CC=C(NCC2=CN(C)C(=O)NC2=O)N1</chem>                                 |
|     |    |
| 298 | <chem>CCN(CC1CCCO1)C=2N=CN=C3N(CC4(O)CCOC4C)C=NC23</chem>                           |
|     |   |
| 299 | <chem>CC(CN1CCOCC1)N(C)C=2N=CN=C3N(CC(O)C4CCCO4)C=NC23</chem>                       |
|     |  |
| 300 | <chem>CC1OCCC1(O)CN2C=NC=3C(=NC=NC23)N4CC[C@H]([C@H]4C)N(C)CCO</chem>               |

|     |                                                                                     |
|-----|-------------------------------------------------------------------------------------|
|     | 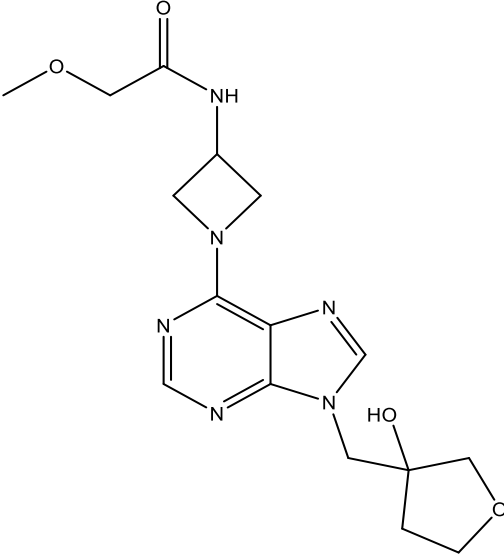   |
| 301 | <chem>COCC(=O)NC1CN(C1)C=2N=CN=C3N(CC4(O)CCOC4)C=NC23</chem>                        |
|     |  |
| 302 | <chem>CNC(=O)C1CCCN1C=2N=CN=C3N(CC4(O)CCOCC4)C=NC23</chem>                          |
|     |  |
| 303 | <chem>OCC1(CN2C=NC=3C(=NC=NC23)N4CCC[C@H]5[C@H]4CNC5=O)COC1</chem>                  |
|     |  |
| 304 | <chem>CC1CN(CC1N2CCOCC2)C=3N=CN=C4N(C=NC34)C5CC(CO)(CO)C5</chem>                    |

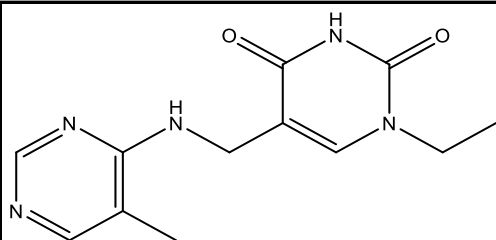

305 CCN1C=C(CNC=2N=CN=CC2C)C(=O)NC1=O

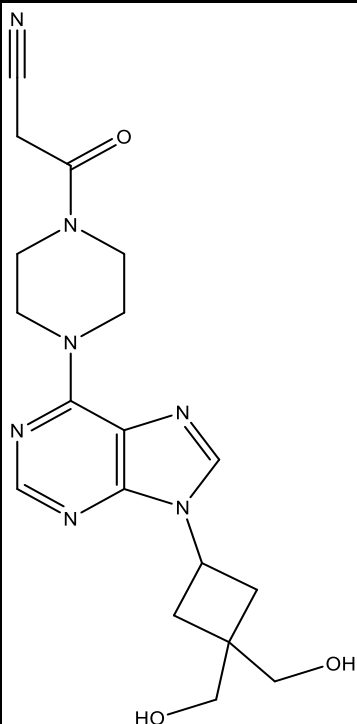

306 OCC1(CO)CC(C1)N2C=NC=3C(=NC=NC23)N4CCN(CC4)C(=O)CC#N

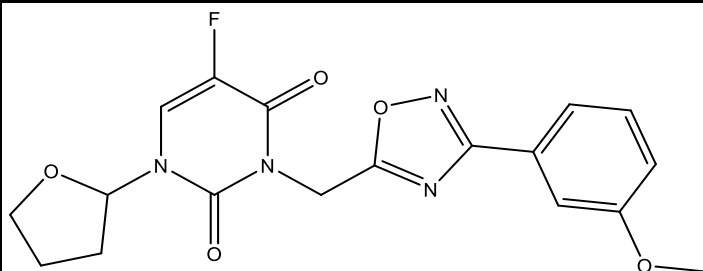

307 COC=1C=CC=C(C1)C2=NOC(CN3C(=O)C(F)=CN(C4CCCO4)C3=O)=N2

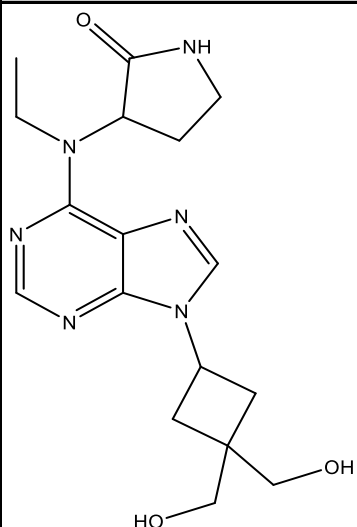

308 CCN(C1CCNC1=O)C=2N=CN=C3N(C=NC23)C4CC(CO)(CO)C4

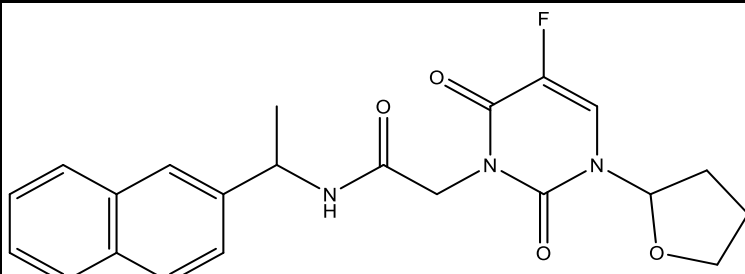

309 CC(NC(=O)CN1C(=O)C(F)=CN(C2CCCO2)C1=O)C=3C=CC=4C=CC=CC4C3



|     |                                                                                     |
|-----|-------------------------------------------------------------------------------------|
|     | 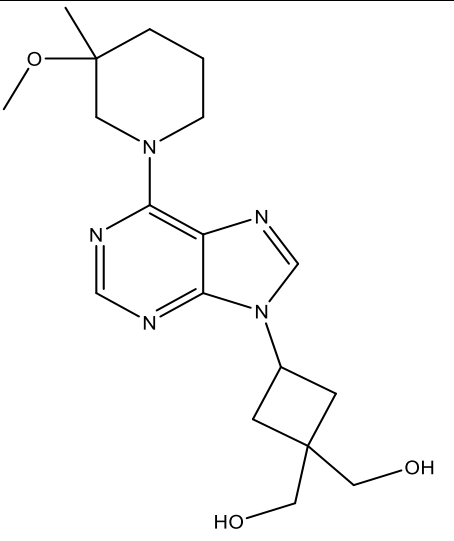   |
| 310 | <chem>COC1(C)CCCN(C1)C=2N=CN=C3N(C=NC23)C4CC(CO)(CO)C4</chem>                       |
|     |  |
| 311 | <chem>OCC1(CO)CC(C1)N2C=NC=3C(=NC=NC23)N4CCOC5(CCCOC5)C4</chem>                     |
| 312 |  |
| 312 | <chem>CC1CNC(C)CN(C1)C(=O)CCN2C=C(C(=O)N)C(=O)NC2=O.O=C(F)(F)F</chem>               |
| 313 |  |
| 313 | <chem>OC(CN1C=NC=2C(=NC=NC12)N3CCCCC3C4CNC(=O)C4)C5CCCCO5</chem>                    |

|  |                                                                                                                                                                    |
|--|--------------------------------------------------------------------------------------------------------------------------------------------------------------------|
|  | 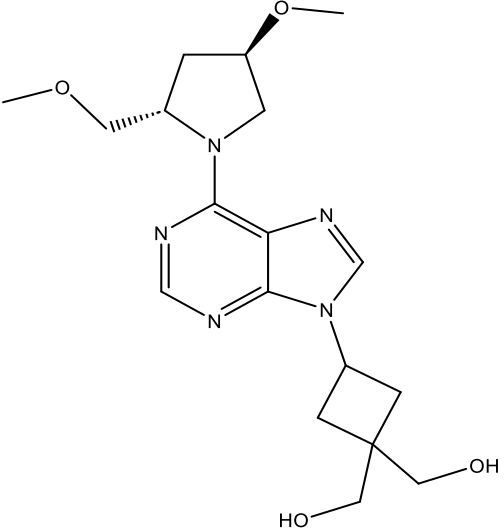 <p>314 <chem>COC[C@H]1C[C@H](CN1C=2N=CN=C3N(C=NC23)C4CC(CO)(CO)C4)OC</chem></p>  |
|  |  <p>315 <chem>CC(C)CC1N(CCNC1=O)C=2N=CN=C3N(CC4(O)CCOC4C)C=NC23</chem></p>       |
|  |  <p>316 <chem>CN1C=C(CNC=2C=CC=CC2)C(=O)N(C)C1=O</chem></p>                     |
|  |  <p>317 <chem>CC(=O)N1CC(C1)C(=O)NC=2N=CN=C3N(CC4CCCCO4)C(C)=C(C)C23</chem></p> |

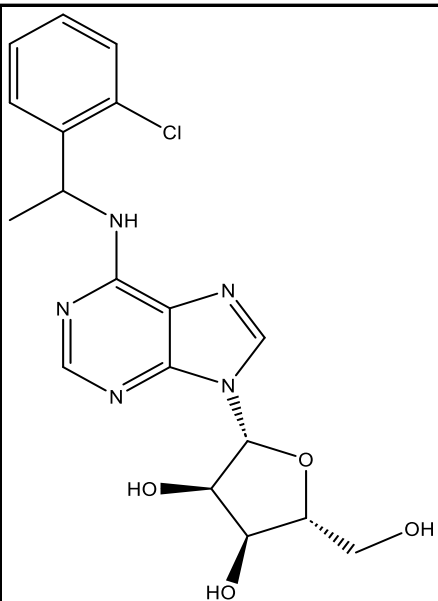

318 CC(NC=1N=CN=C2N(C=NC12)[C@@H]3O[C@H](CO)[C@@H](O)[C@H]3O)C=4C=CC=CC4Cl

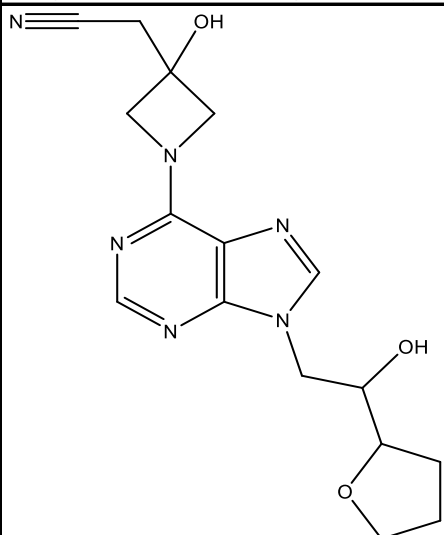

319 OC(CN1C=NC=2C(=NC=NC12)N3CC(O)(CC#N)C3)C4CCCO4

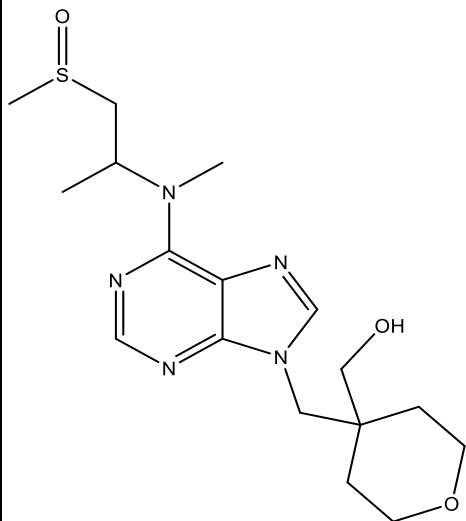

320 CC(CS(=O)C)N(C)C=1N=CN=C2N(CC3(CO)CCOCC3)C=NC12
