# Supplementary material for: FRET Assays for the Identification of C. albicans HSP90-Sba1 and Human HSP90α-p23 Binding Inhibitors
Source: MDPI journal article supplement (doi:10.3390/ph17040516), 2024-04-17
Supplement: s1 [file s1]

AcuK - ACI Assessment

15/02/2024 15:49

Results: Confidence intervals of determined and true  $K_d$  with different confidence levels

Confidence levels

|                                               | 68.3%            | 95.5%            | 99.7%            |
|-----------------------------------------------|------------------|------------------|------------------|
| Confidence interval of determined $K_d$ (ECI) | 197.07-237.81 nM | 176.70-258.18 nM | 156.32-278.56 nM |
| Confidence interval of true $K_d$ (ACI)       | 209.33-249.21 nM | 196.25-266.1 nM  | 180.46-280.36 nM |

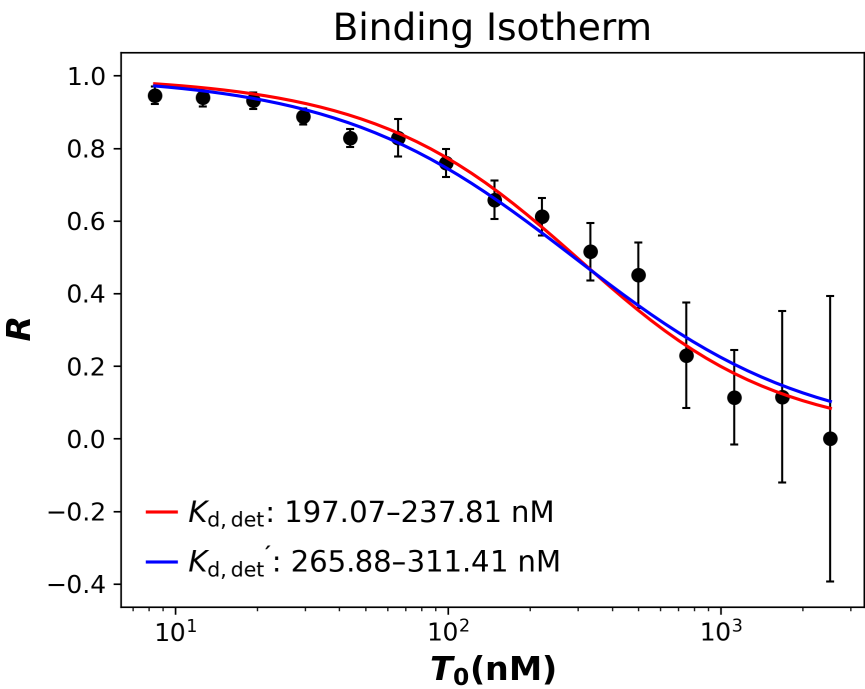

Input Data of Binding Isotherm

( $L_0= 157.0$  nM)

| $T_0$ (nM) | $R$ Values                | $R$ RSD               |
|------------|---------------------------|-----------------------|
| 2523.0     | -6.66666667<br>549344e-09 | 0.393771158<br>499173 |
| 1682.0     | 0.115033214<br>4444444    | 0.236295598<br>586142 |
| 1121.053   | 0.113823836<br>666667     | 0.129871134<br>709478 |
| 747.649    | 0.229466982<br>777778     | 0.145085681<br>410565 |
| 498.713    | 0.4504173                 | 0.090731633<br>612911 |
| 332.195    | 0.515304177<br>777778     | 0.078931639<br>678993 |
| 221.183    | 0.611538577<br>777778     | 0.052101069<br>295692 |
| 148.016    | 0.657958811<br>111111     | 0.053276848<br>308774 |
| 98.397     | 0.759524333<br>333333     | 0.038537633<br>315728 |
| 65.598     | 0.829083388<br>888889     | 0.051689305<br>690115 |
| 43.732     | 0.828231977<br>777778     | 0.025103764<br>749873 |
| 29.435     | 0.887954333<br>333333     | 0.022286682<br>887209 |

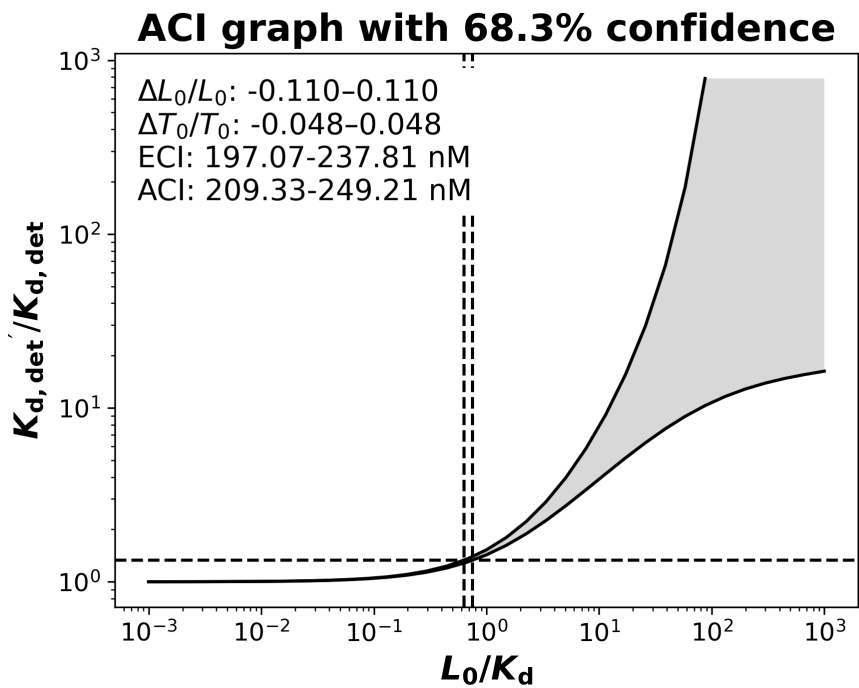

# AcuK - ACI Assessment

|                            |                       |                       |
|----------------------------|-----------------------|-----------------------|
| 15/02/2024 15:49<br>19.343 | 0.931115488<br>888889 | 0.022318519<br>100595 |
| 12.615                     | 0.939761822<br>222222 | 0.024872457<br>758472 |
| 8.41                       | 0.9458468             | 0.024194721<br>93248  |
| 0.0                        | 0.987135366<br>666667 | 0.007682458<br>542518 |

**Analysis:**

ECI ( $K_{d,det}$ ): 197.07-237.81 nM

$K_{d,det}'/K_{d,det}$ : 1.33

$L_0/K_d$ : 0.63-0.75

ACI ( $K_{d,true}$ ): 209.33-249.21 nM

$K_{d,det}/K_{d,true}$ : 0.87-1.04
