# Supplementary material for: FRET Assays for the Identification of C. albicans HSP90-Sba1 and Human HSP90α-p23 Binding Inhibitors
Source: MDPI journal article supplement (doi:10.3390/ph17040516), 2024-04-17
Supplement: s1 [file s1]

AcuK - ACI Assessment

15/02/2024 15:45

Results: Confidence intervals of determined and true  $K_d$  with different confidence levels

Confidence levels

|                                               | 68.3%           | 95.5%           | 99.7%           |
|-----------------------------------------------|-----------------|-----------------|-----------------|
| Confidence interval of determined $K_d$ (ECI) | 83.97-106.20 nM | 72.85-117.31 nM | 61.74-128.42 nM |
| Confidence interval of true $K_d$ (ACI)       | 99.46-120.39 nM | 93.37-127.97 nM | 87.56-136.57 nM |

Binding Isotherm

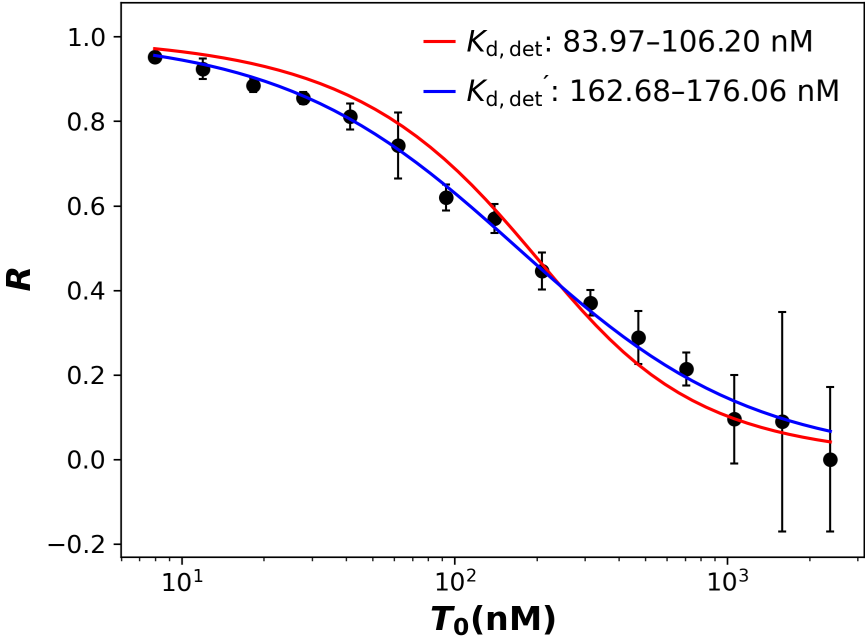

Input Data of Binding Isotherm

( $L_0= 183.0$  nM)

| $T_0$ (nM) | $R$ Values                | $R$ RSD               |
|------------|---------------------------|-----------------------|
| 2385.0     | -4.44444445<br>135694e-09 | 0.170952613<br>643146 |
| 1590.0     | 0.089082256<br>666667     | 0.259693952<br>365186 |
| 1059.735   | 0.095233475<br>555556     | 0.104543482<br>55911  |
| 706.755    | 0.213277377<br>777778     | 0.038984101<br>679075 |
| 471.435    | 0.288606455<br>555556     | 0.062645229<br>86613  |
| 314.025    | 0.3702753                 | 0.030514968<br>000803 |
| 209.085    | 0.445797777<br>777778     | 0.043786788<br>671264 |
| 139.92     | 0.569947566<br>666667     | 0.033908812<br>723575 |
| 93.015     | 0.6193277                 | 0.030973187<br>905429 |
| 62.01      | 0.742837166<br>666667     | 0.077809411<br>755809 |
| 41.34      | 0.810896855<br>555556     | 0.030760933<br>293673 |
| 27.825     | 0.854907255<br>555556     | 0.014508428<br>912714 |

ACI graph with 68.3% confidence

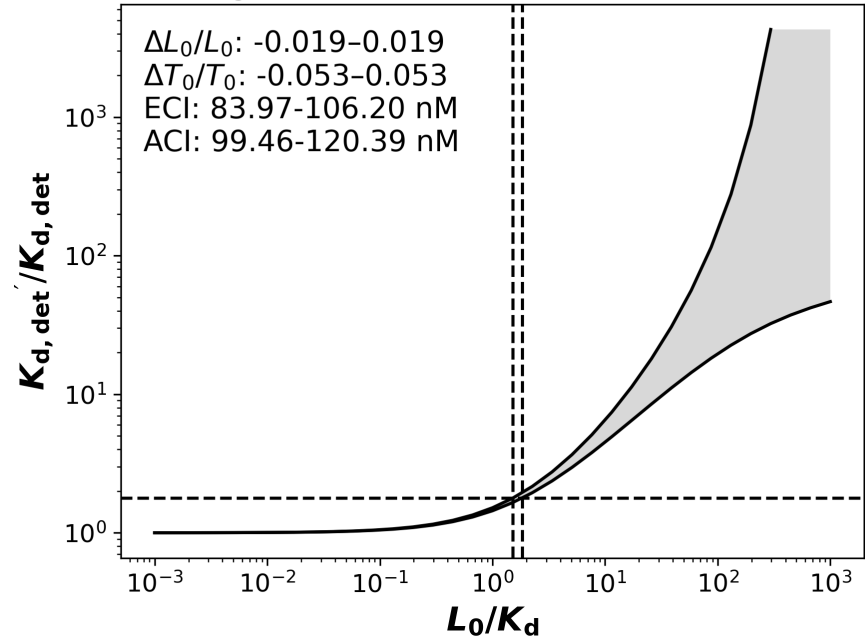

# AcuK - ACI Assessment

|                            |                       |                       |
|----------------------------|-----------------------|-----------------------|
| 15/02/2024 15:45<br>18.285 | 0.885011177<br>777778 | 0.015921556<br>226213 |
| 11.925                     | 0.924100977<br>777778 | 0.024133986<br>517605 |
| 7.95                       | 0.9520356             | 0.009974094<br>8751   |
| 0.0                        | 0.999999922<br>222222 | 0.021520858<br>365245 |

**Analysis:**

ECI ( $K_{d,det}$ ): 83.97-106.20 nM

$K_{d,det}'/K_{d,det}$ : 1.78

$L_0/K_d$ : 1.52-1.84

ACI ( $K_{d,true}$ ): 99.46-120.39 nM

$K_{d,det}/K_{d,true}$ : 0.79-0.96
